# Supplementary material for: The aqueous dependent sensing of hydrazine and phosphate anions using a bis-heteroleptic Ru(ii) complex with a phthalimide–anchored pyridine-triazole ligand
Source: Royal Society of Chemistry journal article supplement (doi:10.1039/d0an02299c), 2020-12-18
Supplement: d0an02299c1.pdf [file d0an02299c1.pdf]

## Supporting Information

### **Aqueous dependent sensing of hydrazine and phosphate anions using bis-heteroleptic Ru(II) Complex with phthalimide anchored pyridine-triazole ligand**

Mohanraj Ramachandran<sup>a</sup>, Asad Syed,<sup>b</sup> Najat Marraiki,<sup>b</sup> and Sambandam Anandan<sup>\*a</sup>

<sup>a</sup>Department of Chemistry, National Institute of Technology, Tiruchirappalli 620 015, India

<sup>b</sup>Department of Botany & Microbiology, College of Science, King Saud University, Riyadh 11451, Saudi Arabia

# TABLE OF CONTENT

| No. | Content                                                                                                                                                                                                                                                                                                                                                                                                                     | Fig. No. |
|-----|-----------------------------------------------------------------------------------------------------------------------------------------------------------------------------------------------------------------------------------------------------------------------------------------------------------------------------------------------------------------------------------------------------------------------------|----------|
| 1.  | $^1\text{H}$ NMR spectrum of $\text{TpN}_3$ in $\text{CDCl}_3$                                                                                                                                                                                                                                                                                                                                                              | Fig. S1  |
| 2.  | $^{13}\text{C}$ NMR spectrum of $\text{TpN}_3$ in $\text{CDCl}_3$                                                                                                                                                                                                                                                                                                                                                           | Fig. S2  |
| 3.  | $^1\text{H}$ NMR spectrum of $\text{TpH}$ in $\text{CDCl}_3$                                                                                                                                                                                                                                                                                                                                                                | Fig. S3  |
| 4.  | $^{13}\text{C}$ NMR spectrum of $\text{TpH}$ in $\text{CDCl}_3$                                                                                                                                                                                                                                                                                                                                                             | Fig. S4  |
| 5.  | $^1\text{H}$ NMR spectrum of $\text{TpI}$ in $\text{CDCl}_3$                                                                                                                                                                                                                                                                                                                                                                | Fig. S5  |
| 6.  | $^{13}\text{C}$ NMR spectrum of $\text{TpI}$ in $\text{CDCl}_3$                                                                                                                                                                                                                                                                                                                                                             | Fig. S6  |
| 7.  | $^1\text{H}$ NMR spectrum of $\text{RtpH}$ in $\text{CD}_3\text{CN}$                                                                                                                                                                                                                                                                                                                                                        | Fig. S7  |
| 8.  | $^1\text{H}$ NMR spectrum of $\text{RtpH}$ in $\text{DMSO-d}_6$                                                                                                                                                                                                                                                                                                                                                             | Fig. S8  |
| 9.  | Expanded $^1\text{H}$ NMR spectrum of $\text{RtpH}$ in $\text{DMSO-d}_6$                                                                                                                                                                                                                                                                                                                                                    | Fig. S9  |
| 10. | $^{13}\text{C}$ NMR spectrum of $\text{RtpH}$ in $\text{DMSO-d}_6$                                                                                                                                                                                                                                                                                                                                                          | Fig. S10 |
| 11. | $^1\text{H}$ NMR spectrum of $\text{RtpI}$ in $\text{DMSO-d}_6$                                                                                                                                                                                                                                                                                                                                                             | Fig. S11 |
| 12. | $^{13}\text{C}$ NMR spectrum of $\text{RtpI}$ in $\text{DMSO-d}_6$                                                                                                                                                                                                                                                                                                                                                          | Fig. S12 |
| 13. | HR ESI- Mass spectrum of $\text{TpH}$                                                                                                                                                                                                                                                                                                                                                                                       | Fig. S13 |
| 14. | HR ESI- Mass spectrum of $\text{RtpH}$                                                                                                                                                                                                                                                                                                                                                                                      | Fig. S14 |
| 15. | HR ESI- Mass spectrum of $\text{tpI}$                                                                                                                                                                                                                                                                                                                                                                                       | Fig. S15 |
| 16. | HR ESI- Mass spectrum of $\text{RtpI}$                                                                                                                                                                                                                                                                                                                                                                                      | Fig. S16 |
| 17. | FT-IR spectra for compound $\text{TpN}_3$ , $\text{TpH}$ , $\text{TpI}$ , $\text{RtpH}$ and $\text{RtpI}$                                                                                                                                                                                                                                                                                                                   | Fig. S17 |
| 18. | (A) UV-Vis spectra of $\text{RtpH}$ (10 $\mu\text{M}$ ) with various anions (5 equiv.) phosphate anions and ( $\text{H}_2\text{PO}_4^-$ and $\text{H}_2\text{P}_2\text{O}_7^{2-}$ ) (1 equiv.), (B) UV-Vis spectra of $\text{RtpI}$ (25 $\mu\text{M}$ ) with various anions (10 equiv.) and phosphate anions ( $\text{H}_2\text{PO}_4^-$ and $\text{H}_2\text{P}_2\text{O}_7^{2-}$ ) (1 equiv.) in $\text{CH}_3\text{CN}$ . | Fig. S18 |
| 19. | (A) UV-Vis spectra of $\text{RtpH}$ (10 $\mu\text{M}$ ) with the addition of $\text{H}_2\text{PO}_4^-$ anions (0-1 equiv.), (B) UV-Vis spectra of $\text{RtpH}$ (10 $\mu\text{M}$ ) with the addition of $\text{H}_2\text{PO}_4^-$ anions (0-1 equiv.) in $\text{CH}_3\text{CN}$ .                                                                                                                                          | Fig. S19 |
| 20. | (A) UV-Vis spectra of $\text{RtpI}$ (10 $\mu\text{M}$ ) with the addition of $\text{H}_2\text{PO}_4^-$ anions (0-1 equiv.), (B) UV-Vis spectra of $\text{RtpI}$ (10 $\mu\text{M}$ ) with the addition of $\text{H}_2\text{PO}_4^-$ anions (0-1 equiv.) in $\text{CH}_3\text{CN}$ .                                                                                                                                          | Fig. S20 |
| 21. | (A) Under UV light illumination, $\text{RtpH}$ with different anions (B) Under UV light illumination, $\text{RtpI}$ with various types of anions                                                                                                                                                                                                                                                                            | Fig. S21 |
| 22. | (A) Emission intensity of $\text{RtpH}$ (10 $\mu\text{M}$ ) with different metal ions (10 equiv.), (B) Emission intensity of $\text{RtpI}$                                                                                                                                                                                                                                                                                  | Fig. S22 |

|     |                                                                                                                                                                                                                                                                                                                                                                                   |                 |
|-----|-----------------------------------------------------------------------------------------------------------------------------------------------------------------------------------------------------------------------------------------------------------------------------------------------------------------------------------------------------------------------------------|-----------------|
|     | (10 $\mu\text{M}$ ) with different metal ions (10 equiv.) in $\text{CH}_3\text{CN}$ .                                                                                                                                                                                                                                                                                             |                 |
| 23. | Time course study of RtpH (10 $\mu\text{M}$ ) upon addition different equivalent of $\text{H}_2\text{PO}_4^-$ (A) $\text{H}_2\text{P}_2\text{O}_7^{2-}$ (B) in $\text{CH}_3\text{CN}$ and Time course study of RtpI (10 $\mu\text{M}$ ) upon addition different equivalent of $\text{H}_2\text{PO}_4^-$ (C) $\text{H}_2\text{P}_2\text{O}_7^{2-}$ (D) in $\text{CH}_3\text{CN}$ . | <b>Fig.S23</b>  |
| 24. | Job's plot of RtpH with (A) $\text{H}_2\text{PO}_4^-$ (B) $\text{H}_2\text{P}_2\text{O}_7^{2-}$ , Job's plot of RtpI with (C) $\text{H}_2\text{PO}_4^-$ (D) $\text{H}_2\text{P}_2\text{O}_7^{2-}$ .                                                                                                                                                                               | <b>Fig. S24</b> |
| 25. | Benesi-Hildebrand plot from emission titration data of RtpH (10 $\mu\text{M}$ ) with $\text{H}_2\text{PO}_4^-$ (A) and $\text{H}_2\text{P}_2\text{O}_7^{2-}$ (B) and of RtpI with $\text{H}_2\text{PO}_4^-$ (C) and $\text{H}_2\text{P}_2\text{O}_7^{2-}$ (D).                                                                                                                    | <b>Fig. S25</b> |
| 26. | (A) Interference study of RtpH (10 $\mu\text{M}$ ) with and without $\text{H}_2\text{PO}_4^-$ anions in presence of different anions (10 equiv.), (B) Interference study of RtpI (10 $\mu\text{M}$ ) with and without $\text{H}_2\text{PO}_4^-$ anions in presence of different anions (10 equiv.)                                                                                | <b>Fig. S26</b> |
| 27. | Linear plot of RtpH with (A) $\text{H}_2\text{PO}_4^-$ (B) $\text{H}_2\text{P}_2\text{O}_7^{2-}$ , Linear plot of RtpI with (C) $\text{H}_2\text{PO}_4^-$ (D) $\text{H}_2\text{P}_2\text{O}_7^{2-}$                                                                                                                                                                               | <b>Fig. S27</b> |
| 28. | The emission intensity of metalloreceptors (RtpH and RtpI, 10 $\mu\text{M}$ ) with phosphate anions ( $\text{H}_2\text{PO}_4^-$ and $\text{H}_2\text{P}_2\text{O}_7^{2-}$ , 10 $\mu\text{M}$ ) upon varying water percentage with $\text{CH}_3\text{CN}$                                                                                                                          | <b>Fig. S28</b> |
| 29. | (A) $^1\text{H}$ NMR titration of RtpH with $\text{H}_2\text{PO}_4^-$ in $\text{CD}_3\text{CN}/\text{D}_2\text{O}$ (9/1, v/v), (B) $^1\text{H}$ NMR titration of RtpI with $\text{H}_2\text{PO}_4^-$ in $\text{CD}_3\text{CN}/\text{D}_2\text{O}$ (9/1, v/v)                                                                                                                      | <b>Fig. S29</b> |
| 30. | (A) Cyclic Voltammetry (A and B) and Differential Pulse Voltammetry (C and D) of metalloreceptors (RtpH and RtpI) with and without phosphate and anions.                                                                                                                                                                                                                          | <b>Fig. S30</b> |
| 31. | (A) UV-Vis spectra of RtpH (25 $\mu\text{M}$ ) with various anions (10 equiv.) and hydrazine (4 equiv.), (B) Uv-Vis spectra of RtpI (25 $\mu\text{M}$ ) with various anions (10 equiv.) and hydrazine (4 equiv.) in $\text{CH}_3\text{CN}/\text{H}_2\text{O}$ (6/4, v/v).                                                                                                         | <b>Fig. S31</b> |
| 32. | (A) UV-Vis spectra of RtpH (25 $\mu\text{M}$ ) with the gradual addition of hydrazine (4 equiv.), (B) Uv-Vis spectra of RtpI (25 $\mu\text{M}$ ) with the gradual addition of hydrazine (4 equiv.) in $\text{CH}_3\text{CN}/\text{H}_2\text{O}$ (6/4, v/v).                                                                                                                       | <b>Fig. S32</b> |
| 33. | The emission intensity of metalloreceptors (RtpH and RtpI, 25 $\mu\text{M}$ ) with hydrazine (100 $\mu\text{M}$ ) upon varying water percentage with $\text{CH}_3\text{CN}$                                                                                                                                                                                                       | <b>Fig. S33</b> |
| 34. | Time course study of RtpH (25 $\mu\text{M}$ ) upon addition different equivalent of hydrazine (B) Time course study of RtpH (25 $\mu\text{M}$ ) upon addition different equivalent of hydrazine                                                                                                                                                                                   | <b>Fig. S34</b> |
| 35. | (A) Job's plot of RtpH with hydrazine , (B) Job's plot of RtpI with hydrazine                                                                                                                                                                                                                                                                                                     | <b>Fig. S35</b> |
| 36. | (A) Linear plot of RtpH with hydrazine , (B) Linear plot of RtpI with hydrazine                                                                                                                                                                                                                                                                                                   | <b>Fig. S36</b> |
| 37. | (A) Non linear fitting of RtpH (25 $\mu\text{M}$ ) upon addition different concentration of Hydrzine (B) Non linear fitting of RtpI (25 $\mu\text{M}$ ) upon addition different concentration of Hydrzine                                                                                                                                                                         | <b>Fig. S37</b> |

|     |                                                                                                                                                                                    |                  |
|-----|------------------------------------------------------------------------------------------------------------------------------------------------------------------------------------|------------------|
| 38. | (A) Lifetime decay of RtpH (10 $\mu$ M) with and without hydrazine (4 equiv.), (B) Lifetime decay of RtpI (10 $\mu$ M) with and without hydrazine (4 equiv.) in CH <sub>3</sub> CN | <b>Fig. S38</b>  |
| 39. | Partial <sup>1</sup> H NMR spectrum of RtpH-NH <sub>2</sub> in DMSO-d <sub>6</sub>                                                                                                 | <b>Fig. S39</b>  |
| 40. | HR-ESI Mass spectra of RtpH-NH <sub>2</sub>                                                                                                                                        | <b>Fig. S40</b>  |
| 41. | HR-ESI Mass spectra of RtpI-NH <sub>2</sub>                                                                                                                                        | <b>Fig. S41</b>  |
| 42. | Cell viability of HeLa cells in the presence of various concentrations of (A) RtpH and (B) RtpI                                                                                    | <b>Fig. S42</b>  |
| 43. | Cellular uptake (HeLa) image of 25 $\mu$ M RtpH and RtpI                                                                                                                           | <b>Fig. S43</b>  |
| 44. | Optimized structure of RtpH, RtpH-NH <sub>2</sub> , RtpH-H <sub>2</sub> PO <sub>4</sub> <sup>-</sup> (from left to right)                                                          | <b>Fig. S44</b>  |
| 45. | Optimized structure of RtpI, RtpI-NH <sub>2</sub> , RtpI-H <sub>2</sub> PO <sub>4</sub> <sup>-</sup> (from left to right)                                                          | <b>Fig. S45</b>  |
| 46. | Probable reaction mechanism of metalloreceptors (RtpH and RtpI) with hydrazine and phosphate anions                                                                                | <b>Fig. S46</b>  |
| 47. | IC <sub>50</sub> Values for cis-Platin and metalloreceptors against HeLa cells                                                                                                     | <b>Table. S1</b> |

## Instruments

The NMR spectra were carried out in Bruker Avance 500 spectrometers using CDCl<sub>3</sub>, CD<sub>3</sub>CN, and DMSO-d<sub>6</sub> solvent (TMS as internal standard) in ppm. The FT-IR spectra were recorded on a Thermo Scientific Nicolet iS5 FT IR Spectrometer. The CHN elemental analysis was carried out from the Vario EL III microanalyzer. UV-Vis and Fluorescence spectra were carried out on Specord S 600 diode-array UV-Vis spectrophotometer and Shimadzu RF-5301 PC spectrofluorophotometer, respectively in RT. The luminescence lifetime was studied with the Time-Correlated Single Photon Counting method (TC-SPC) in a Horiba FluoroMax-4 instrument. The CV and DPV experiment were recorded on an Autolab three-electrode system, where Ag/AgCl as a reference electrode, glassy carbon as a working electrode, and platinum wire as a counter electrode in an acetonitrile solvent containing 0.1 M tetrabutylammonium hexafluorophosphate (tBu<sub>4</sub>N<sup>+</sup>PF<sub>6</sub><sup>-</sup>) as the supporting electrolyte with 100 mV scan rate and the system was calibrated using ferrocene/ferrocenium ion (Fc/Fc<sup>+</sup>) standard.

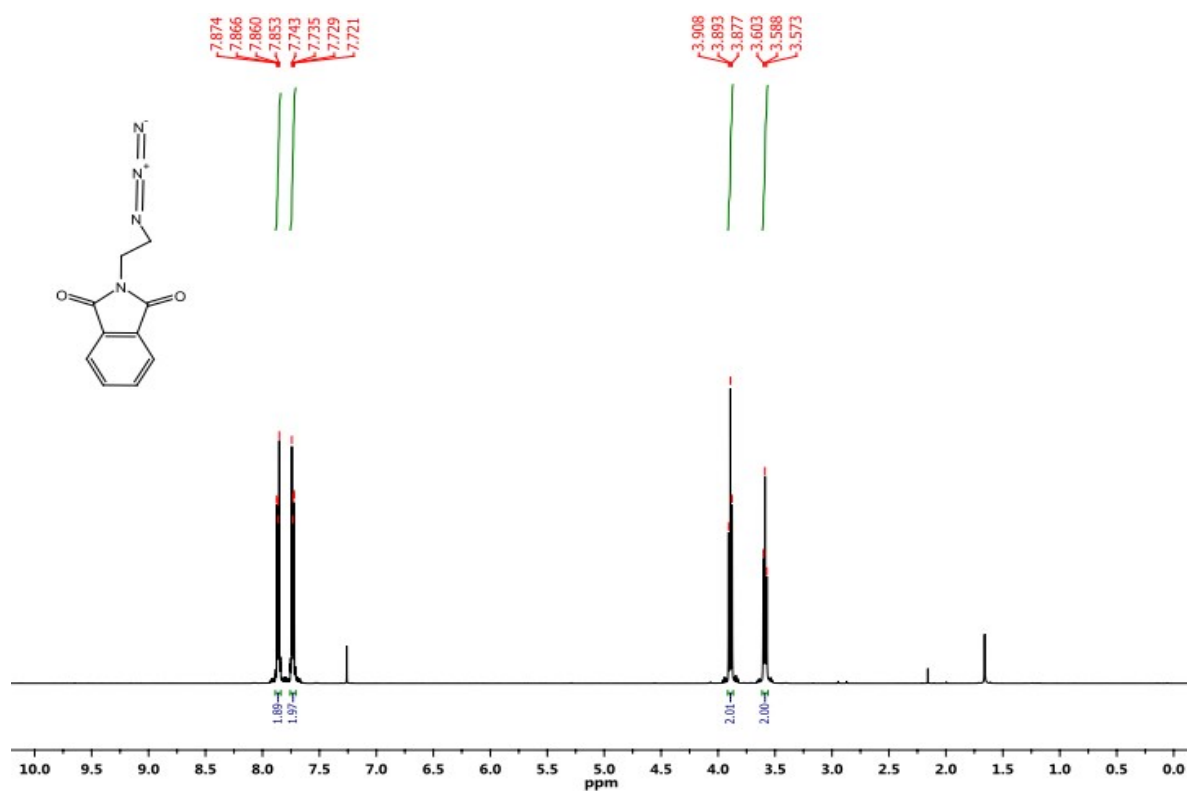

**Fig.S1** <sup>1</sup>H NMR spectrum of TpN<sub>3</sub> in CDCl<sub>3</sub>

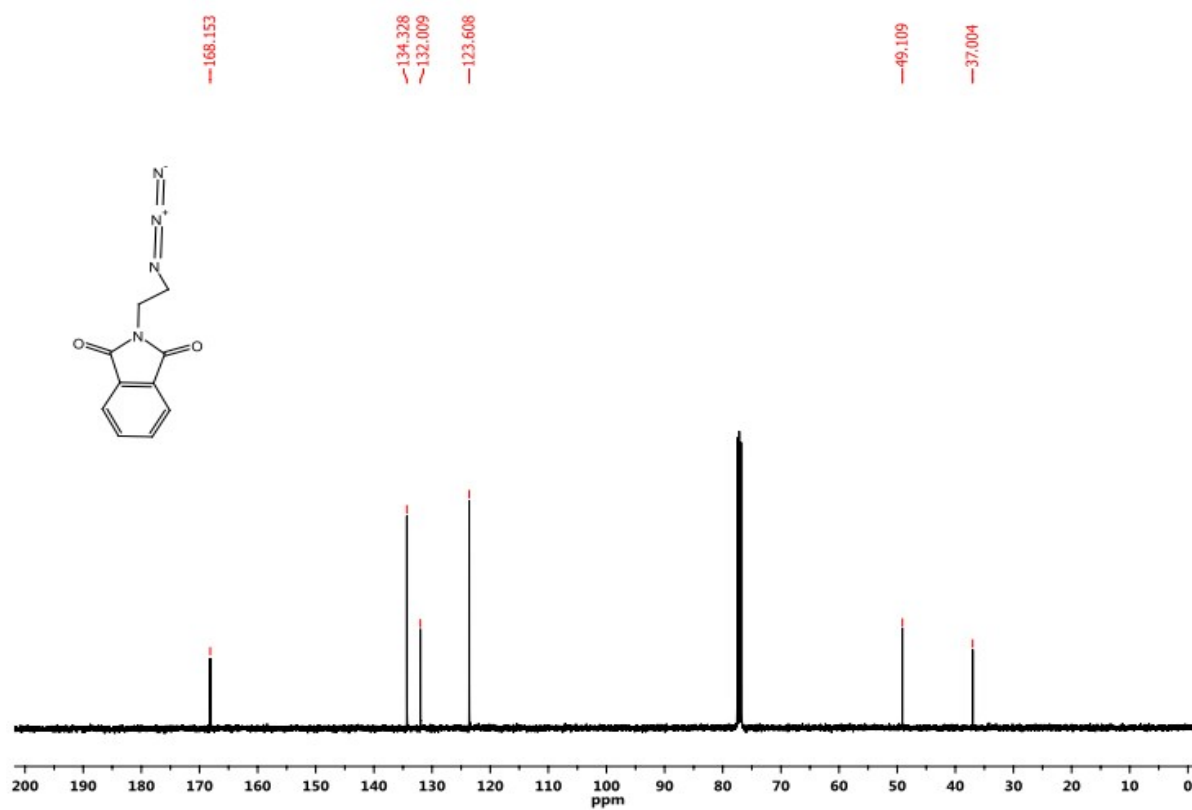

**Fig.S2** <sup>13</sup>C NMR spectrum of TpN<sub>3</sub> in CDCl<sub>3</sub>

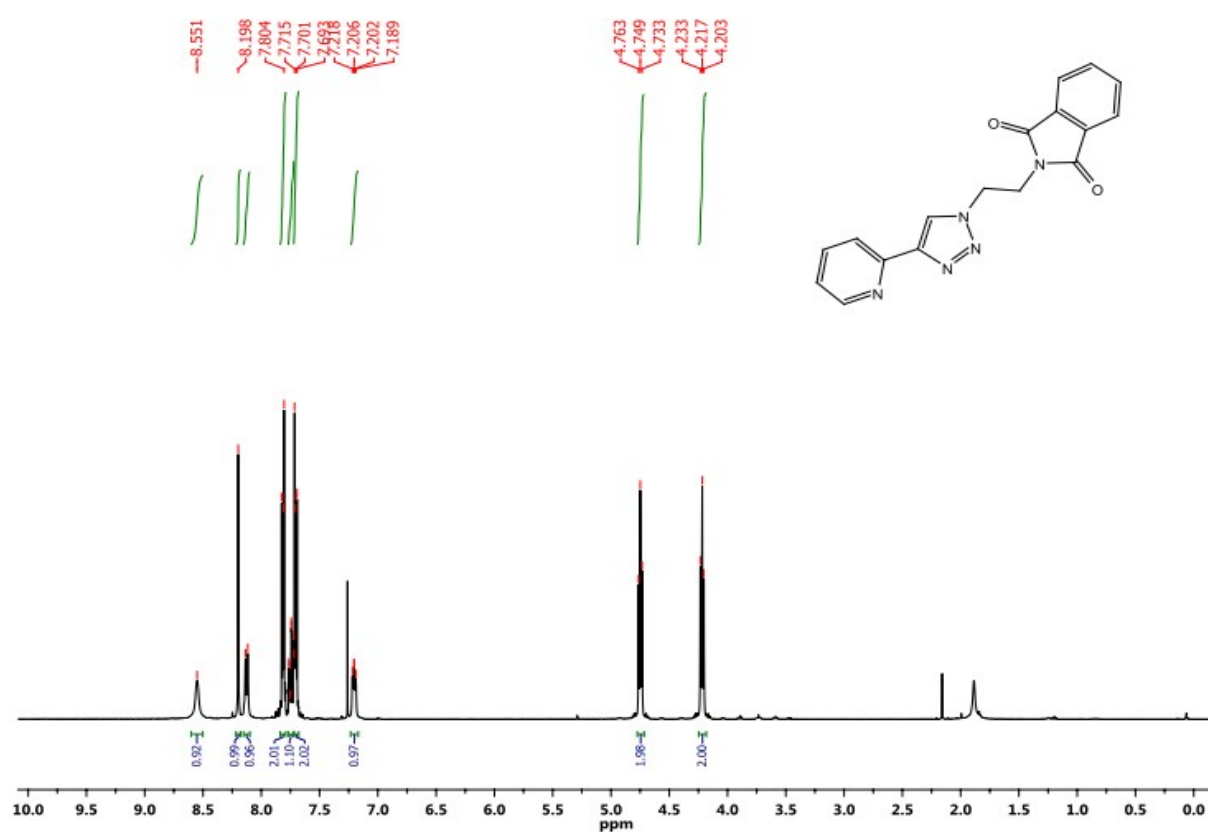

**Fig.S3** <sup>1</sup>H NMR spectrum of TpH in CDCl<sub>3</sub>

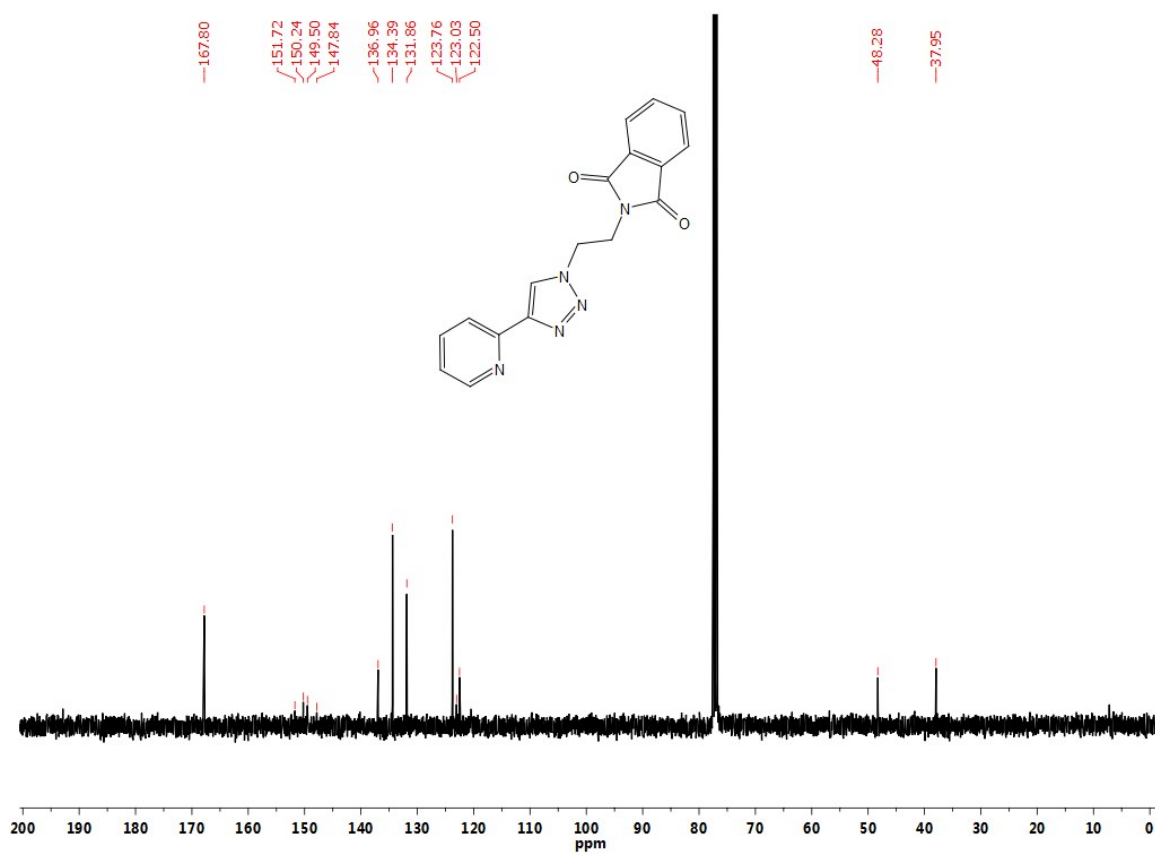

**.S4** <sup>13</sup>C NMR spectrum of TpH in CDCl<sub>3</sub>

**Fig**

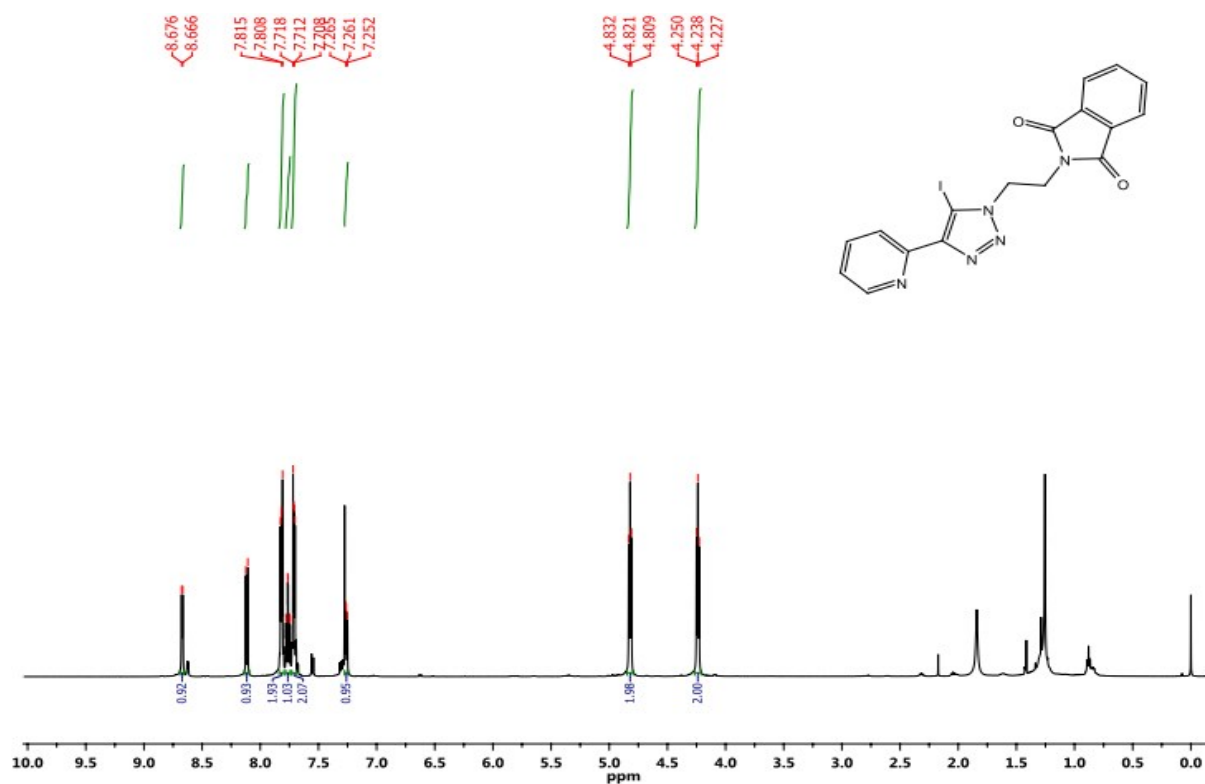

**Fig.S5** <sup>1</sup>H NMR spectrum of TpI in CDCl<sub>3</sub>

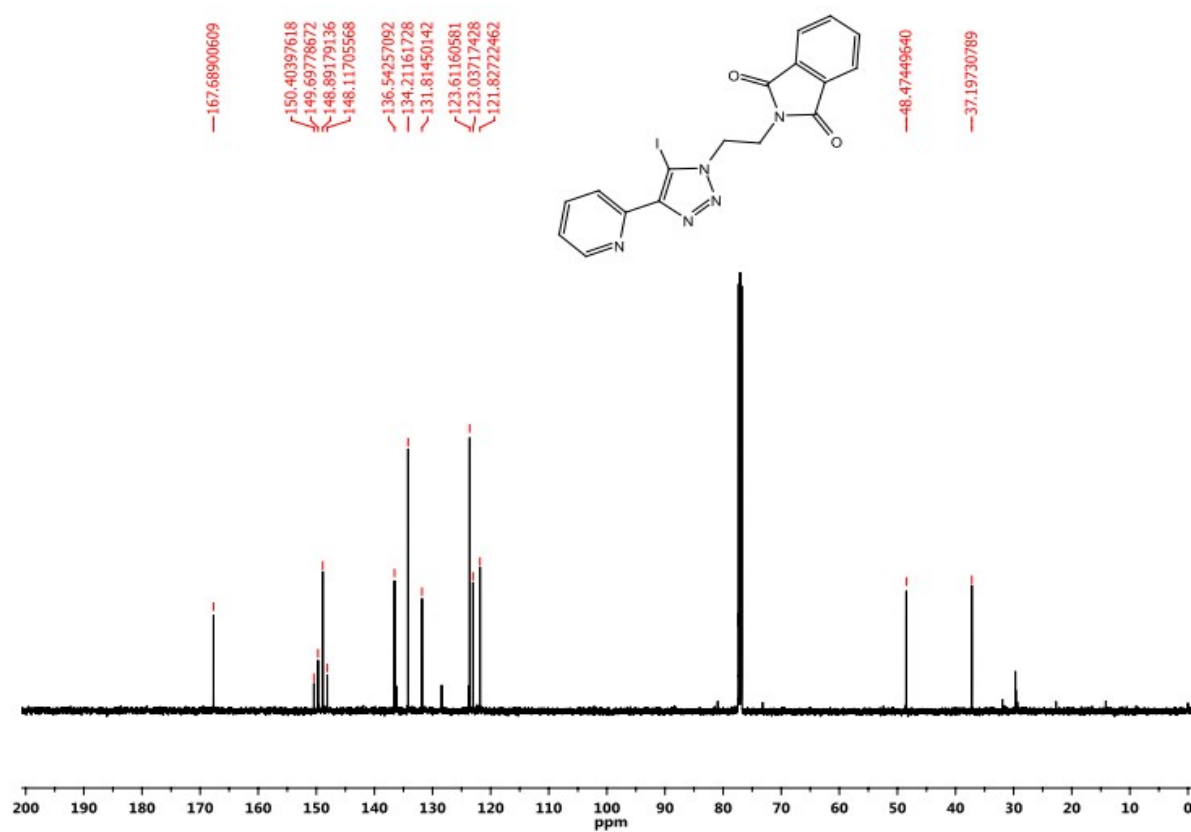

**Fig.S6** <sup>13</sup>C NMR spectrum of TpI in CDCl<sub>3</sub>

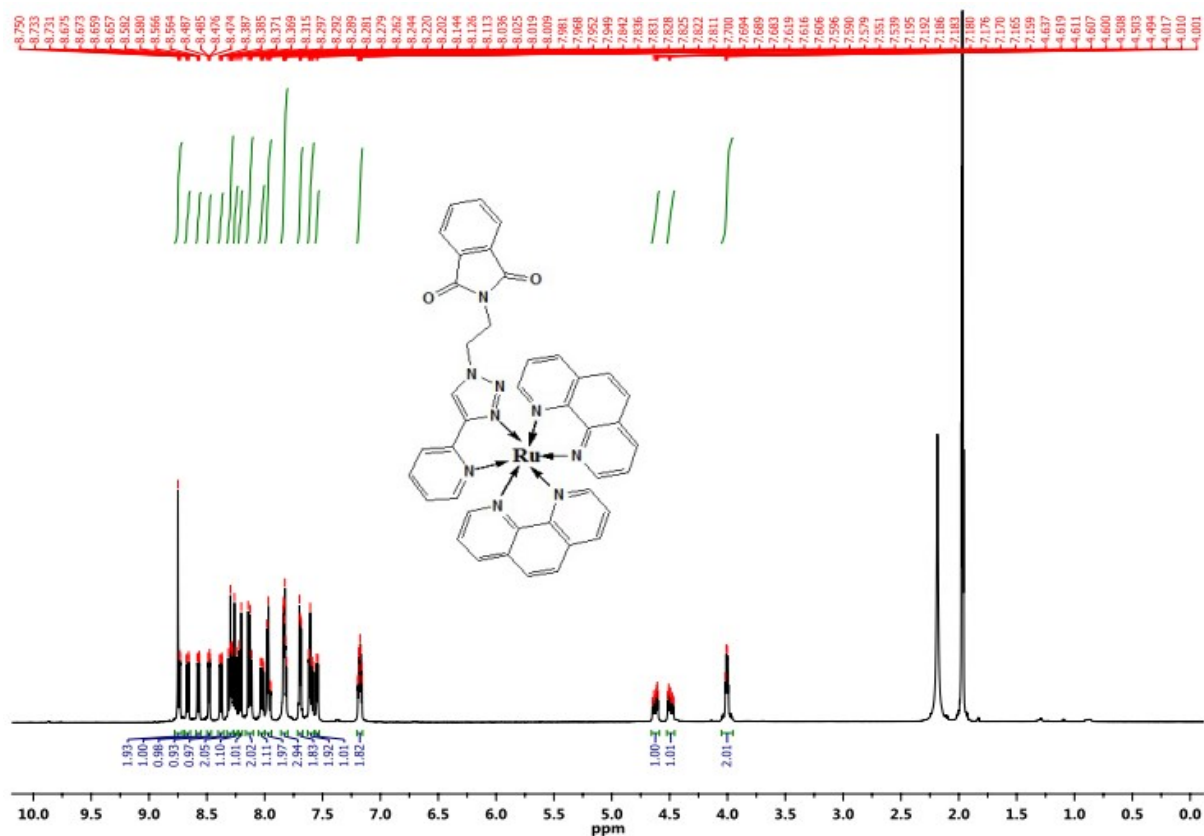

Fig.S7  $^1\text{H}$  NMR spectrum of RtpH in  $\text{CD}_3\text{CN}$

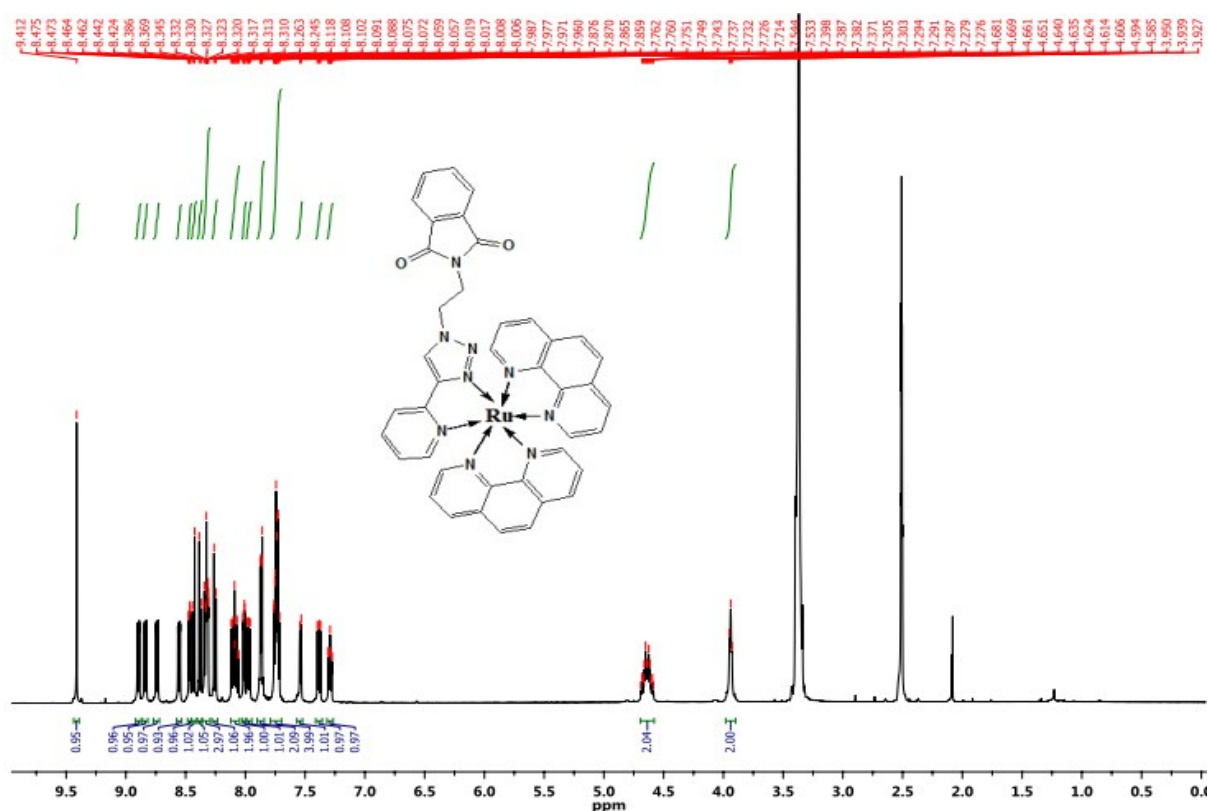

Fig.S8  $^1\text{H}$  NMR spectrum of RtpH in  $\text{DMSO-d}_6$



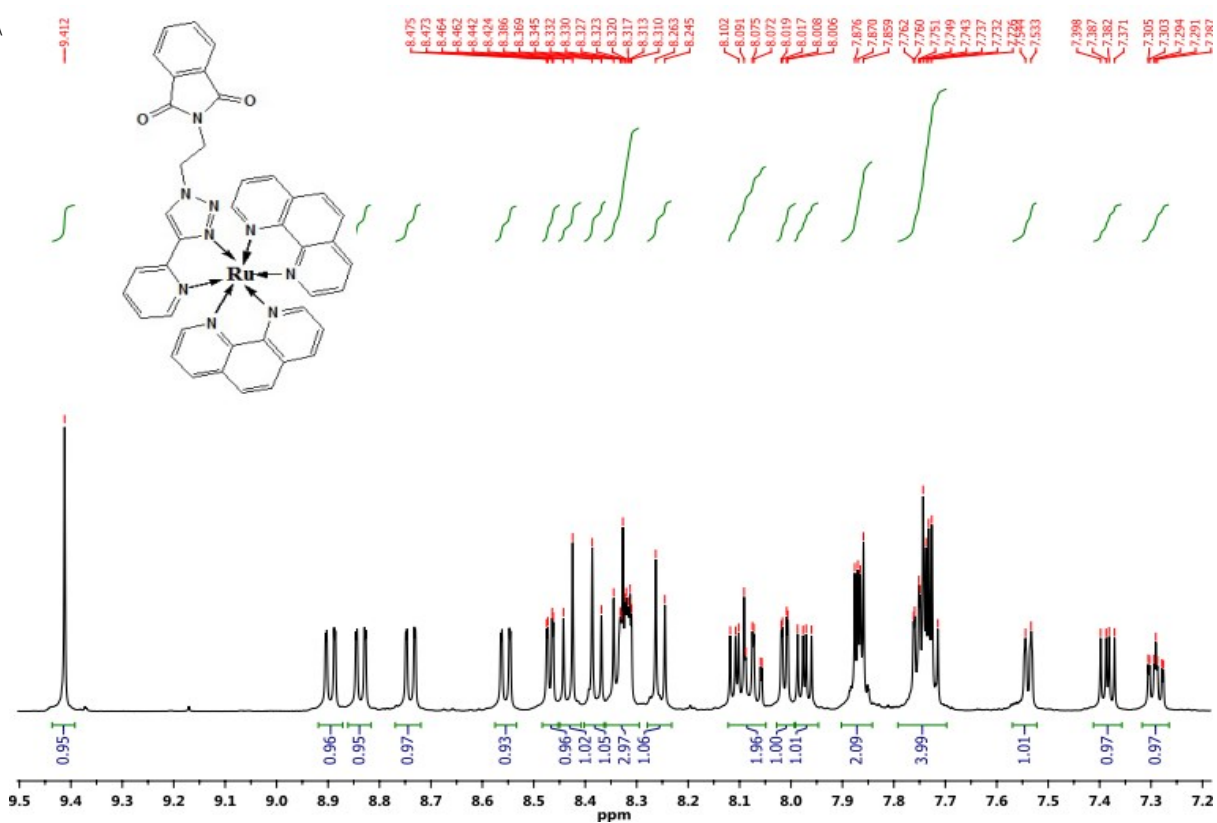

Fig.S9 Expanded  $^1\text{H}$  NMR spectrum of RtpH in  $\text{DMSO-d}_6$

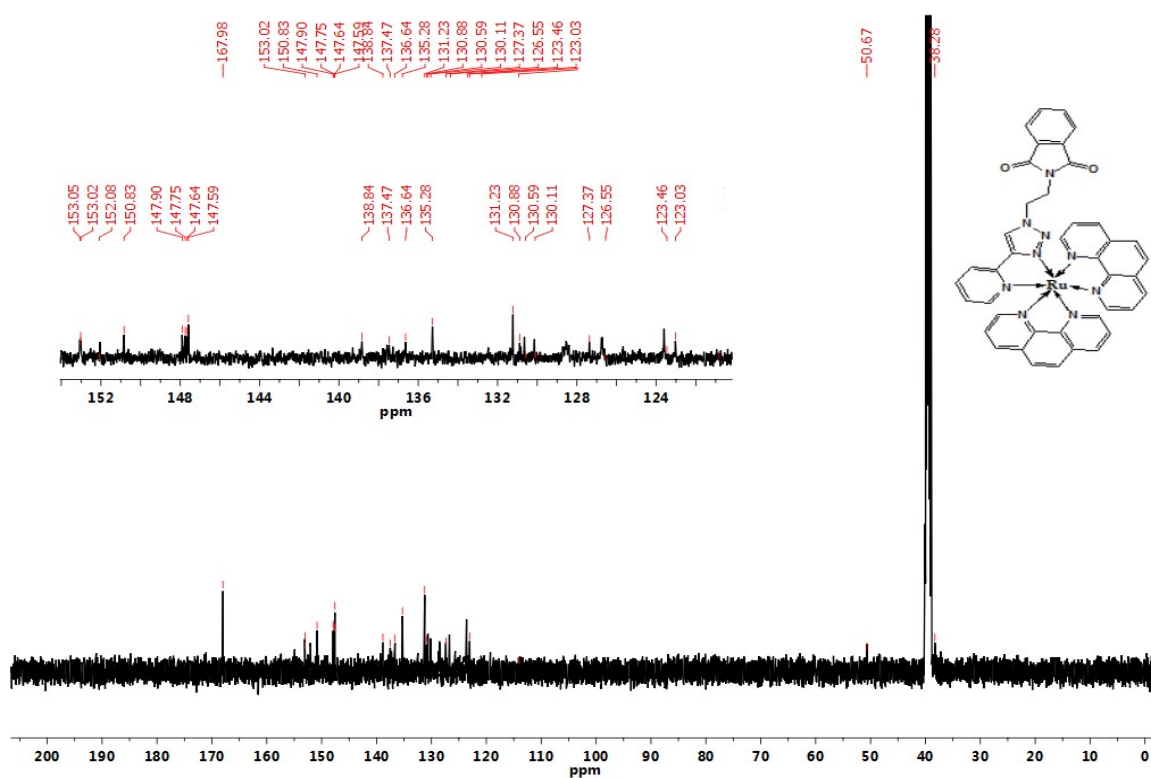

Fig.S10  $^{13}\text{C}$  NMR spectrum of RtpH in  $\text{DMSO-d}_6$



**Acquisition Parameter**

|             |          |                      |          |                  |           |
|-------------|----------|----------------------|----------|------------------|-----------|
| Source Type | ESI      | Ion Polarity         | Positive | Set Nebulizer    | 0.4 Bar   |
| Focus       | Active   | Set Capillary        | 4500 V   | Set Dry Heater   | 180 °C    |
| Scan Begin  | 50 m/z   | Set End Plate Offset | -500 V   | Set Dry Gas      | 4.0 l/min |
| Scan End    | 1800 m/z | Set Charging Voltage | 0 V      | Set Divert Valve | Source    |
|             |          | Set Corona           | 0 nA     | Set APCI Heater  | 0 °C      |

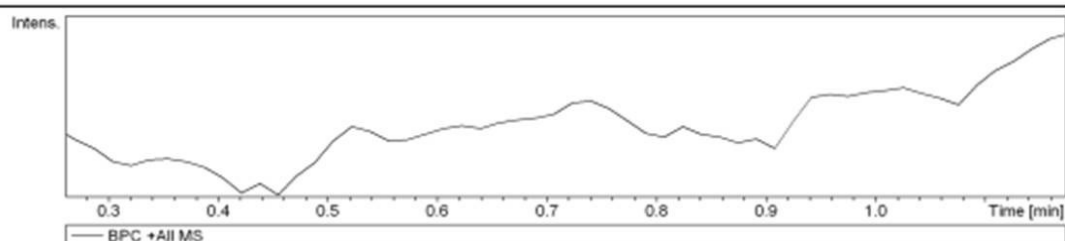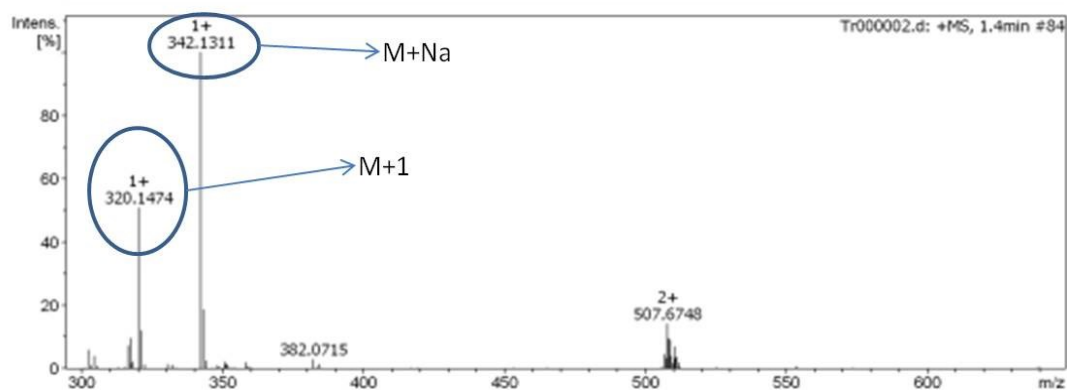

**Fig.S13** HR ESI-Mass spectrum of TpH

**Acquisition Parameter**

|             |            |                      |          |                  |           |
|-------------|------------|----------------------|----------|------------------|-----------|
| Source Type | ESI        | Ion Polarity         | Positive | Set Nebulizer    | 0.4 Bar   |
| Focus       | Not active | Set Capillary        | 4500 V   | Set Dry Heater   | 180 °C    |
| Scan Begin  | 50 m/z     | Set End Plate Offset | -500 V   | Set Dry Gas      | 4.0 l/min |
| Scan End    | 3000 m/z   | Set Charging Voltage | 0 V      | Set Divert Valve | Source    |
|             |            | Set Corona           | 0 nA     | Set APCI Heater  | 0 °C      |

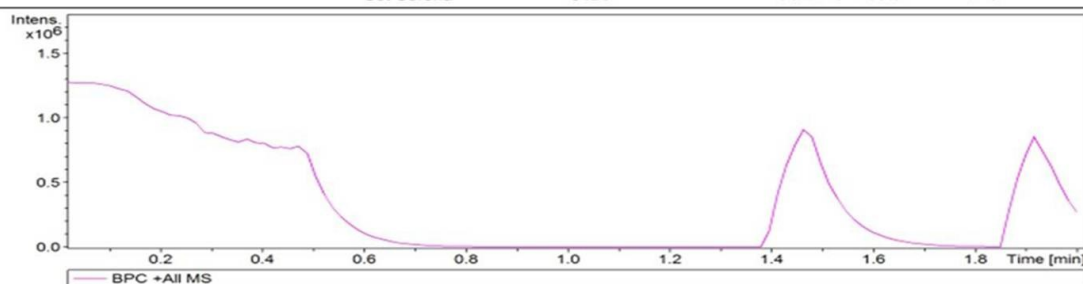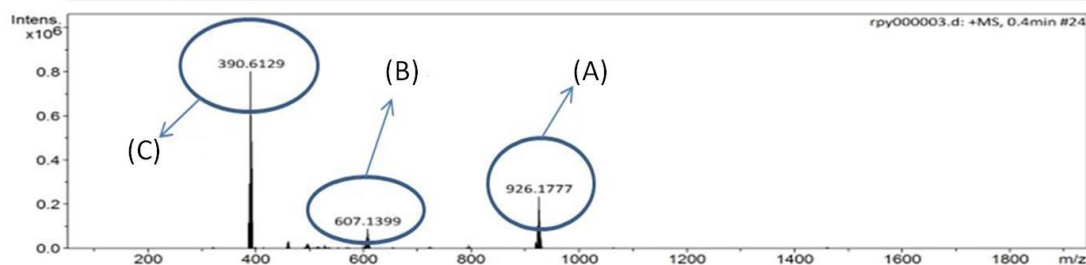

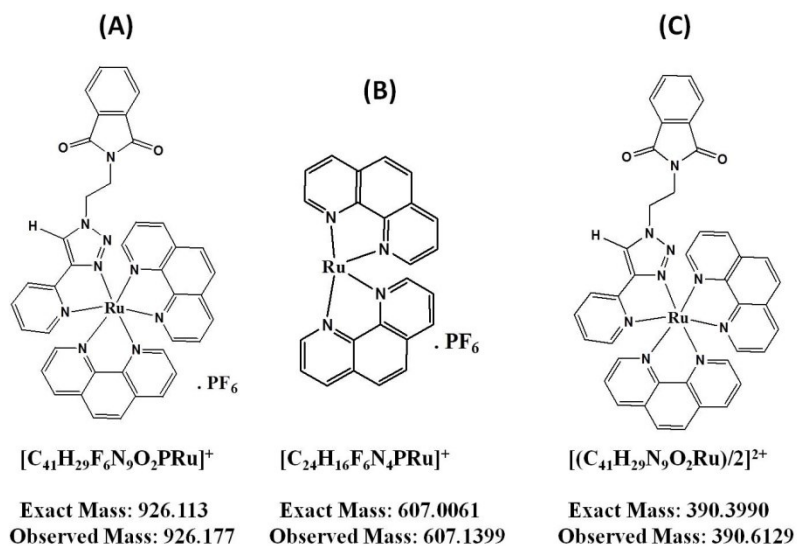

**Fig.S14** HR ESI-Mass spectrum of RtpH

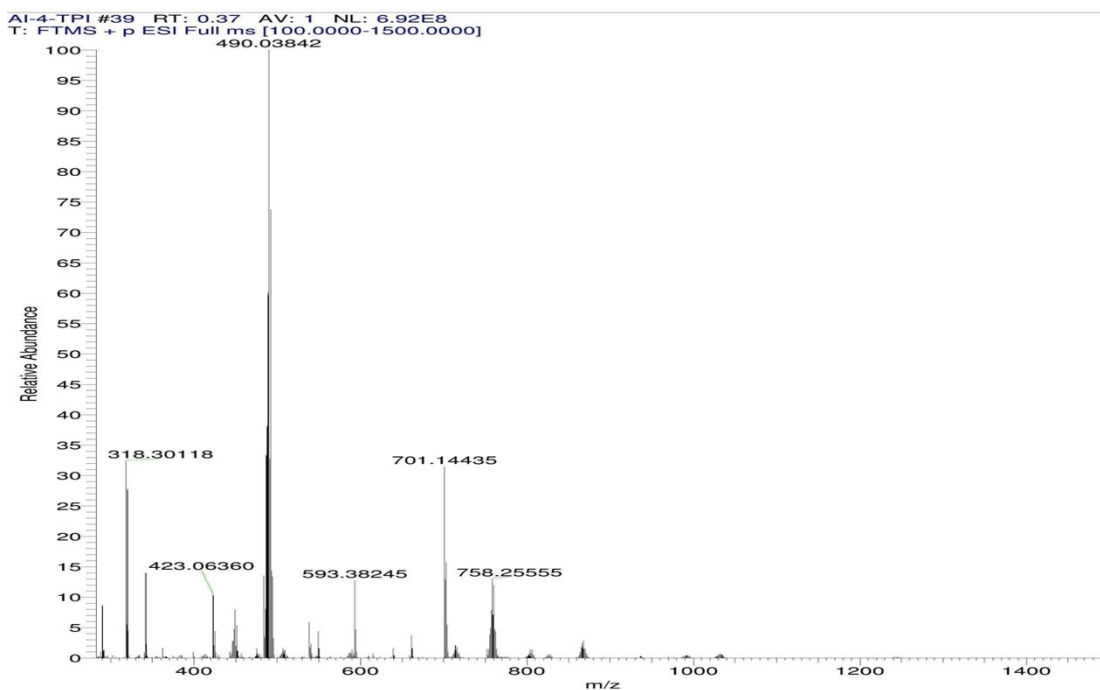

**Fig. S15** HR-ESI Mass spectrum of TplI (Calculated value for  $[C_{17}H_{12}IN_5O_2Ru]^+ + 2Na - H = 489.9747$ , observed = 490.0384)

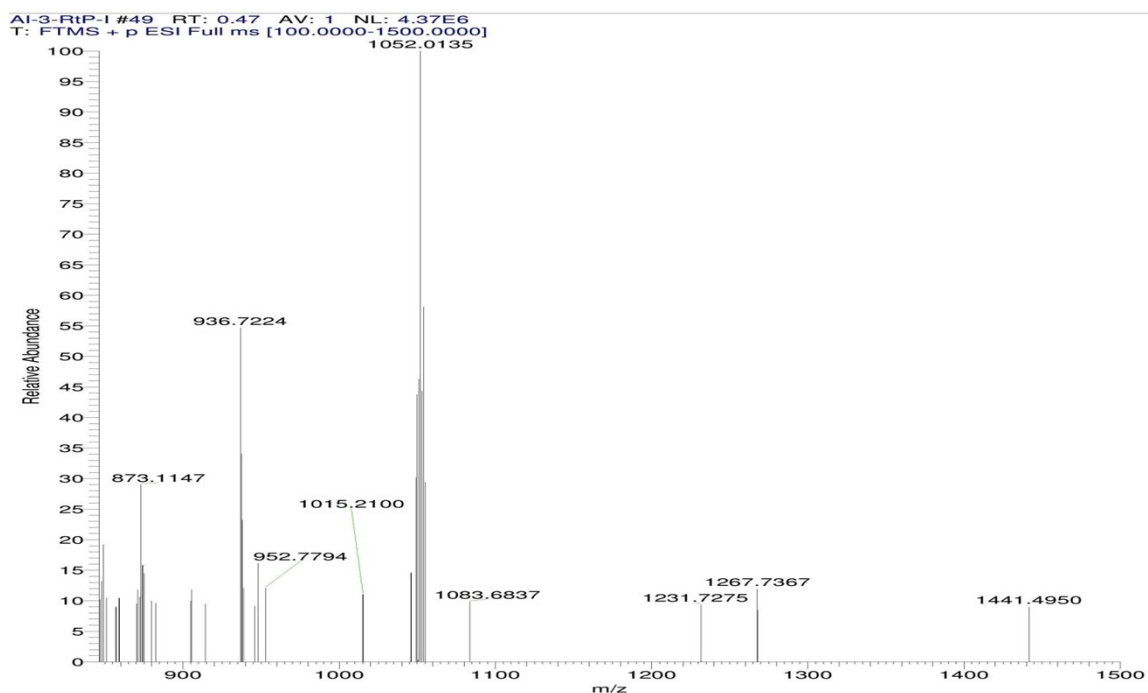

**Fig. S16** HR-ESI Mass spectrum of RtpI (Calculated value for  $[C_{41}H_{28}F_6IN_9O_2PRu]^+ = 1052.0101$ , observed = 1052.0135)

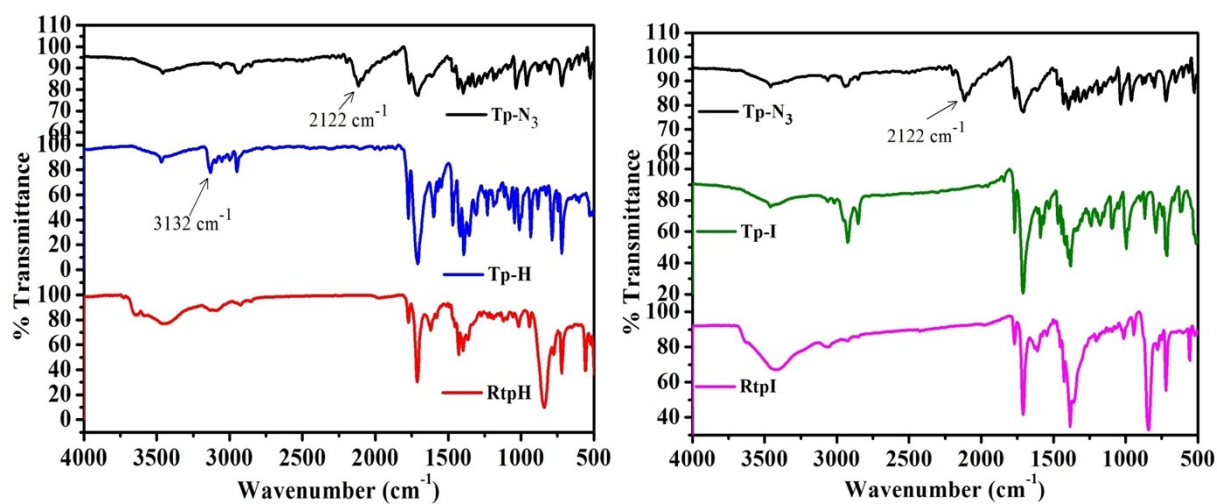

**Fig.S17** FT-IR spectra of TpN<sub>3</sub>,TpH, TpI, RtpH and RtpI.

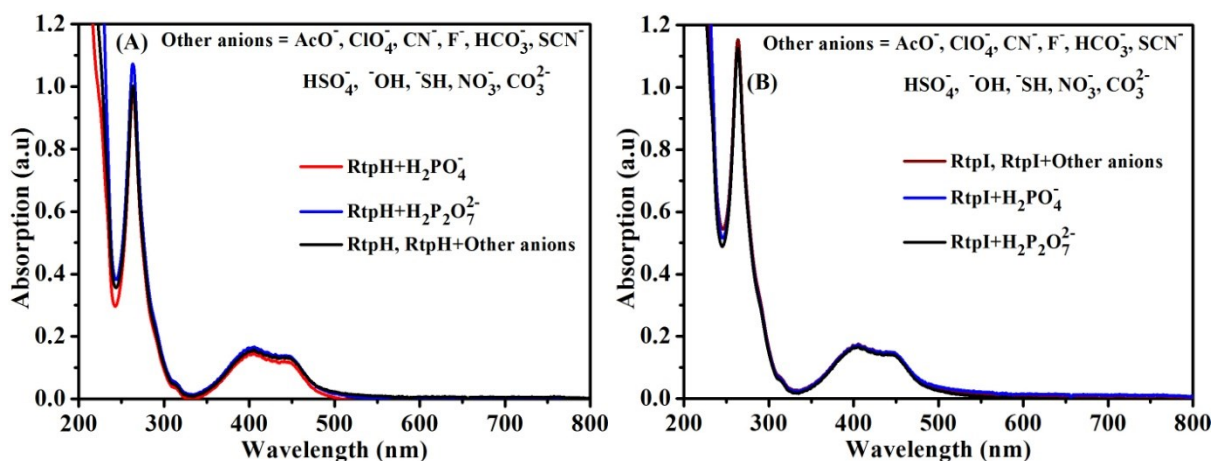

**Fig.S18** (A) UV-Vis spectra of RtpH (10  $\mu\text{M}$ ) with various anions (5 equiv.) and phosphate anions ( $\text{H}_2\text{PO}_4^-$  and  $\text{H}_2\text{P}_2\text{O}_7^{2-}$ ) (1 equiv.), (B) Uv-Vis spectra of RtpI (10  $\mu\text{M}$ ) with various anions (5 equiv.) and phosphate anions ( $\text{H}_2\text{PO}_4^-$  and  $\text{H}_2\text{P}_2\text{O}_7^{2-}$ ) (1 equiv.) in  $\text{CH}_3\text{CN}$ .

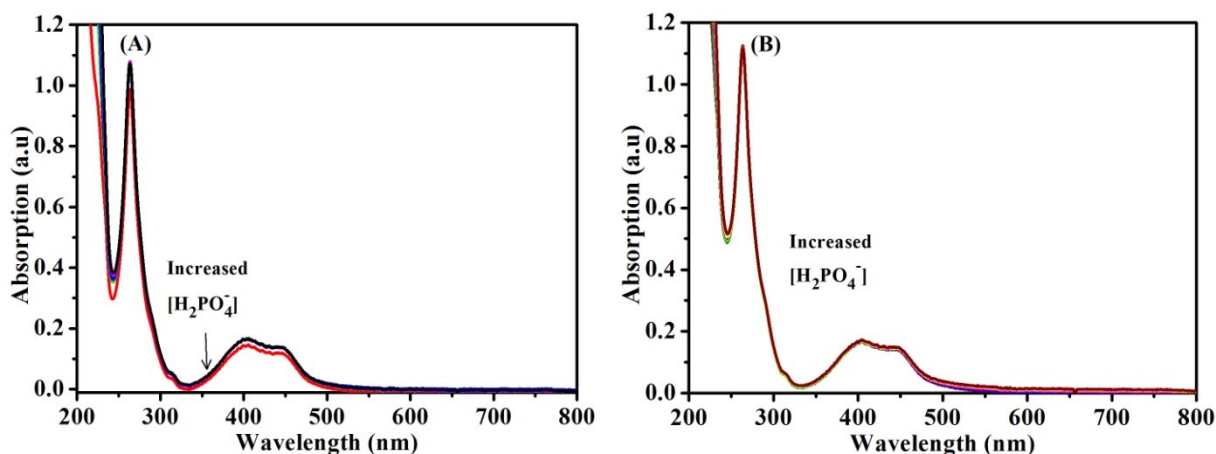

**Fig.S19** (A) UV-Vis spectra of RtpH (10  $\mu\text{M}$ ) with the addition of  $\text{H}_2\text{PO}_4^-$  anions (0-1 equiv.), (B) Uv-Vis spectra of RtpI (10  $\mu\text{M}$ ) with the addition of  $\text{H}_2\text{PO}_4^-$  anions (0-1 equiv.) in  $\text{CH}_3\text{CN}$ .

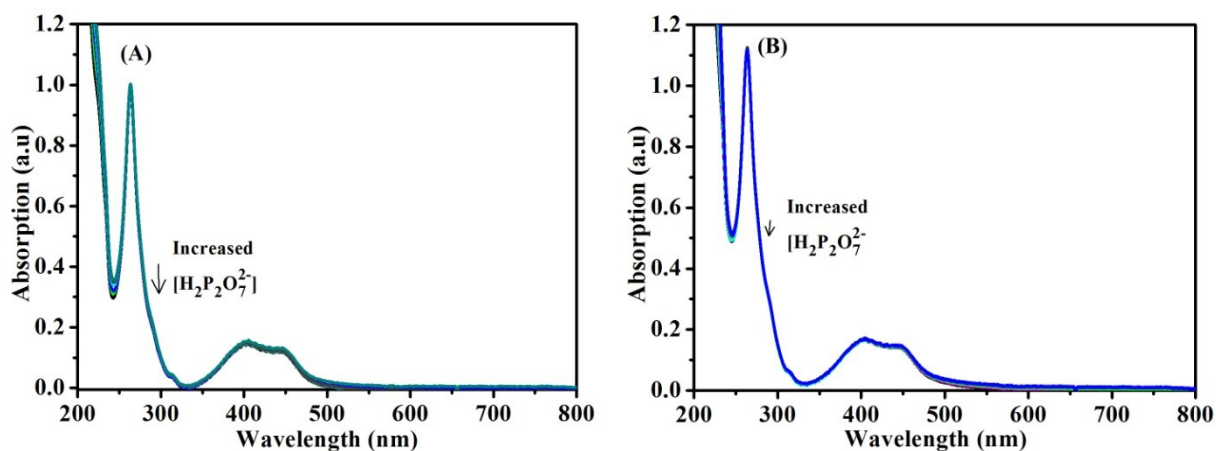

**Fig.S20** (A) UV-Vis spectra of RtpI (10  $\mu\text{M}$ ) with the addition of  $\text{H}_2\text{P}_2\text{O}_7^{2-}$  anions (0-1 equiv.), (B) Uv-Vis spectra of RtpI (10  $\mu\text{M}$ ) with the addition of  $\text{H}_2\text{P}_2\text{O}_7^{2-}$  anions (0-1 equiv.) in  $\text{CH}_3\text{CN}$ .



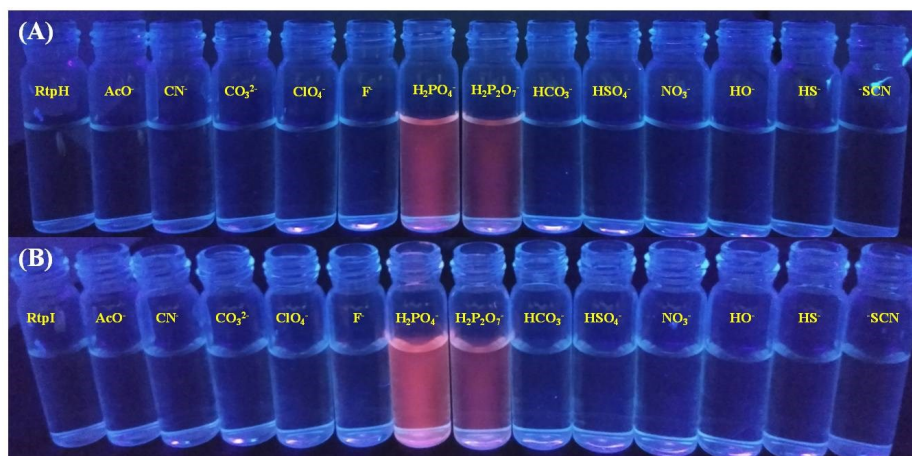

**Fig.S21** Under UV light illumination, (A) RtpH and (B) RtpI with various types of anions in CH<sub>3</sub>CN

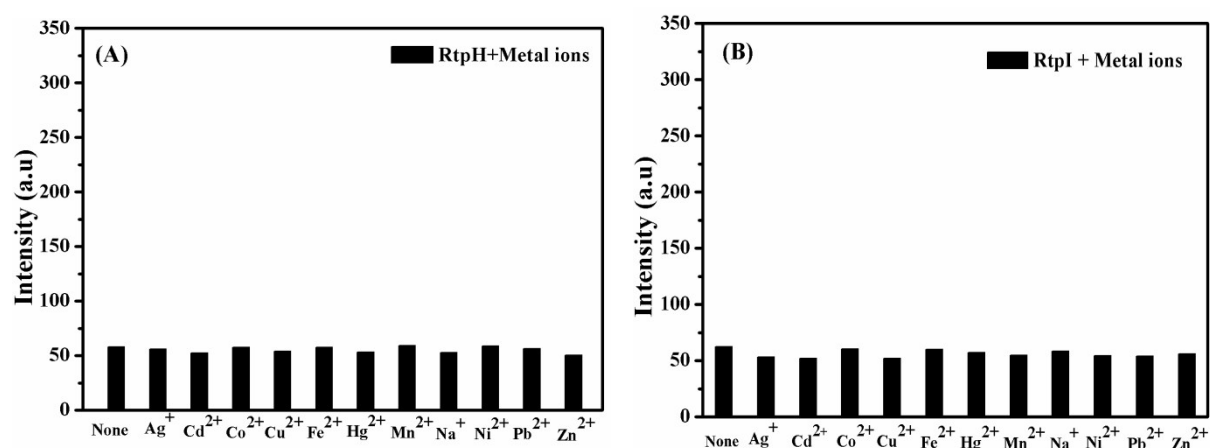

**Fig.S22** (A) Emission intensity of RtpH (10  $\mu$ M) with different metal ions (10 equiv.), (B) Emission intensity of RtpI (10  $\mu$ M) with different metal ions (10 equiv.) in CH<sub>3</sub>CN.

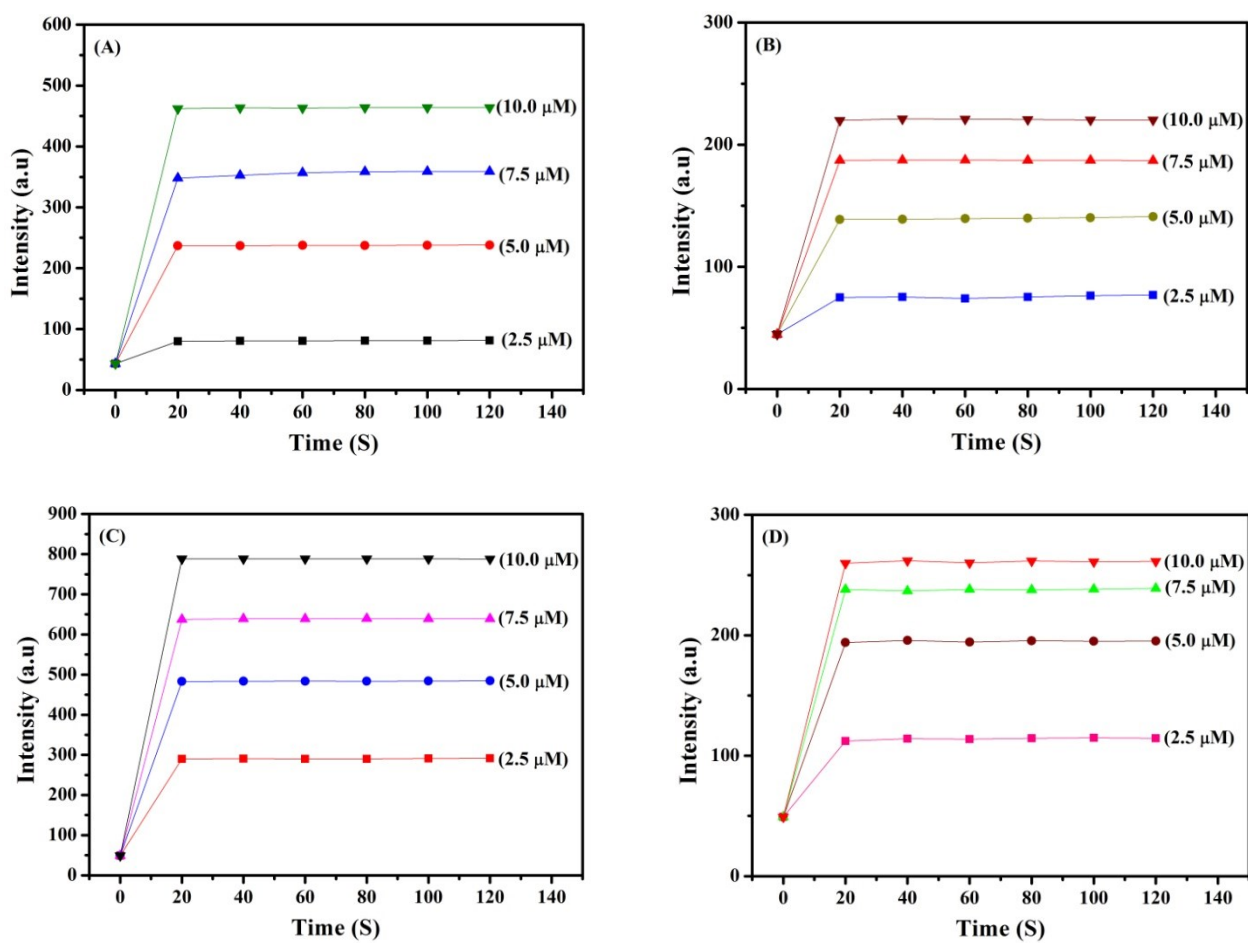

**Fig.S23** (A) Time course study of RtpH (10  $\mu\text{M}$ ) upon addition different equivalent of  $\text{H}_2\text{PO}_4^-$  (B)  $\text{H}_2\text{P}_2\text{O}_7^{2-}$  in  $\text{CH}_3\text{CN}$  and time course study of RtpI (10  $\mu\text{M}$ ) upon addition different equivalent of  $\text{H}_2\text{PO}_4^-$  (C)  $\text{H}_2\text{P}_2\text{O}_7^{2-}$  (D) in  $\text{CH}_3\text{CN}$ .



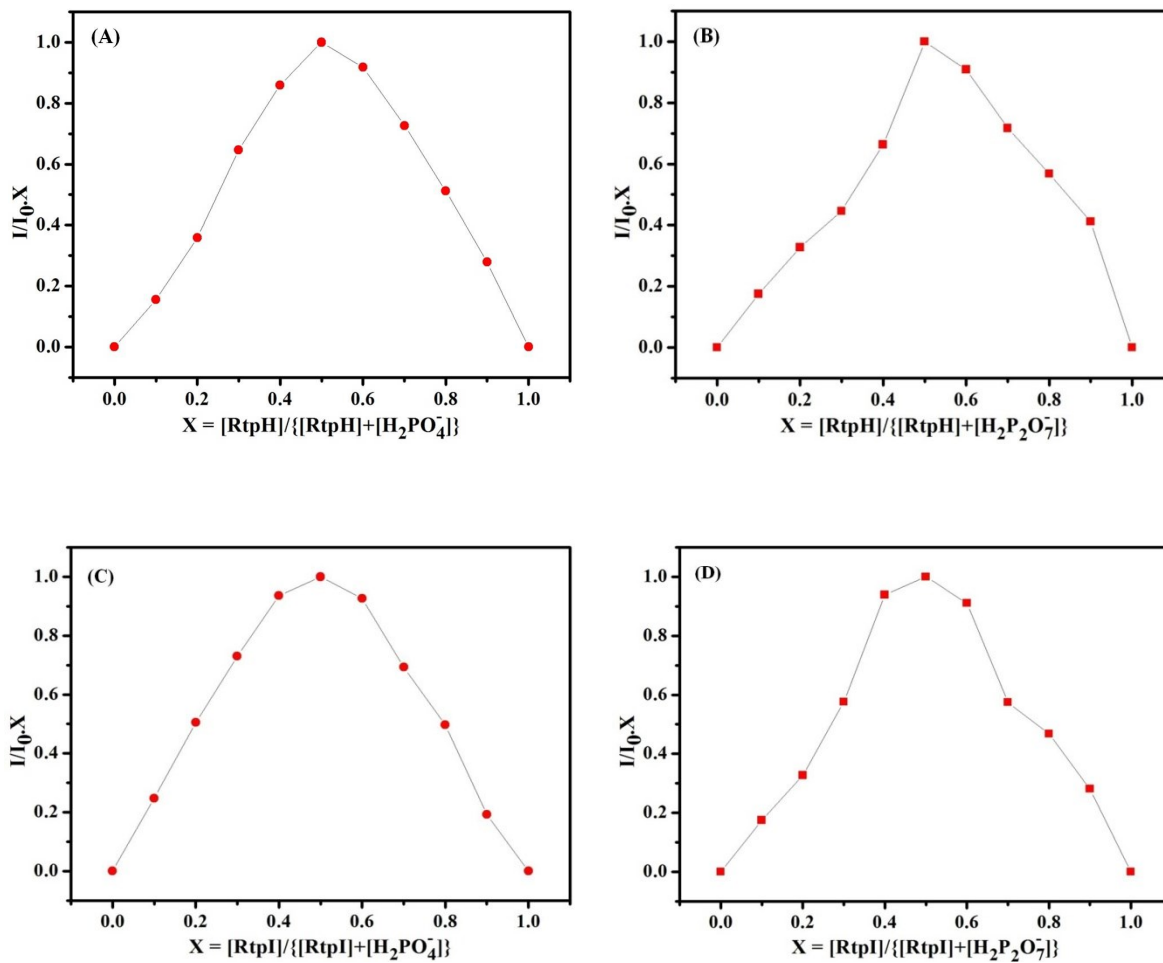

**Fig.S24** Job's plot of RtpH with (A)  $H_2PO_4^-$  (B)  $H_2P_2O_7^{2-}$ , Job's plot of RtpI with (A)  $H_2PO_4^-$  (B)  $H_2P_2O_7^{2-}$

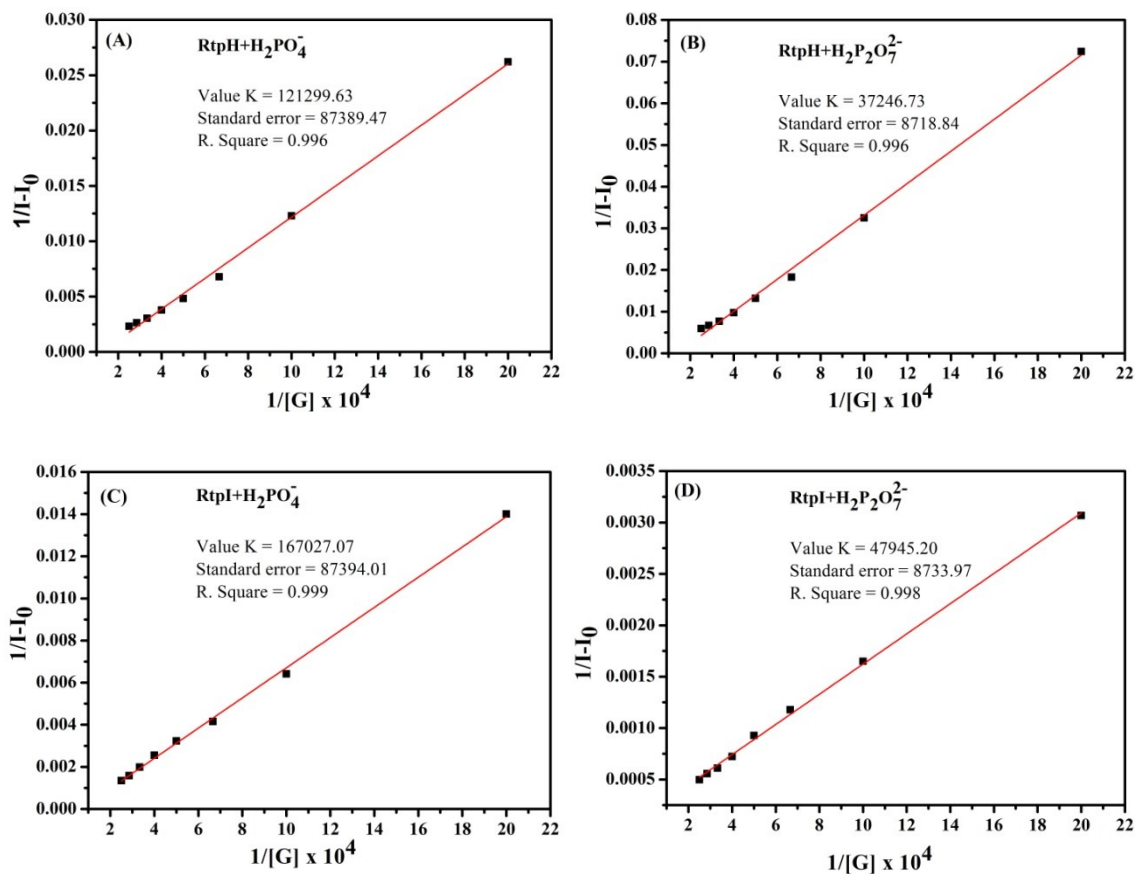

**Fig. S25.** Benesi-Hildebrand plot from emission titration data of RtpH (10  $\mu\text{M}$ ) with  $\text{H}_2\text{PO}_4^-$  (A) and  $\text{H}_2\text{P}_2\text{O}_7^{2-}$  (B) and of RtpI with  $\text{H}_2\text{PO}_4^-$  (C) and  $\text{H}_2\text{P}_2\text{O}_7^{2-}$  (D).

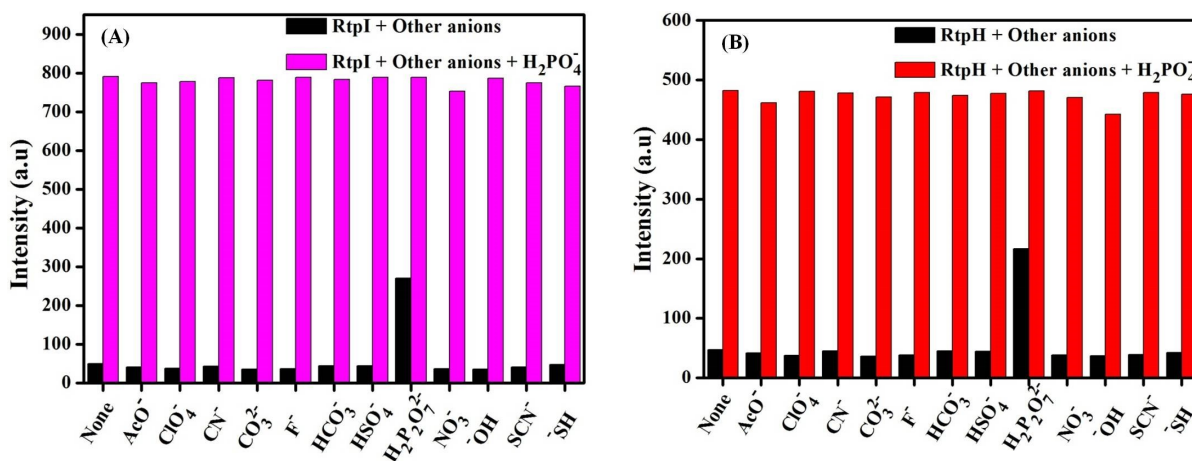

**Fig.S26** (A) Interference study of RtpI (10  $\mu\text{M}$ ) with and without  $\text{H}_2\text{PO}_4^-$  anions in presence of different anions (10 equiv.), (B) Interference study of RtpH (10  $\mu\text{M}$ ) with and without  $\text{H}_2\text{PO}_4^-$  anions in presence of different anions (10 equiv.).

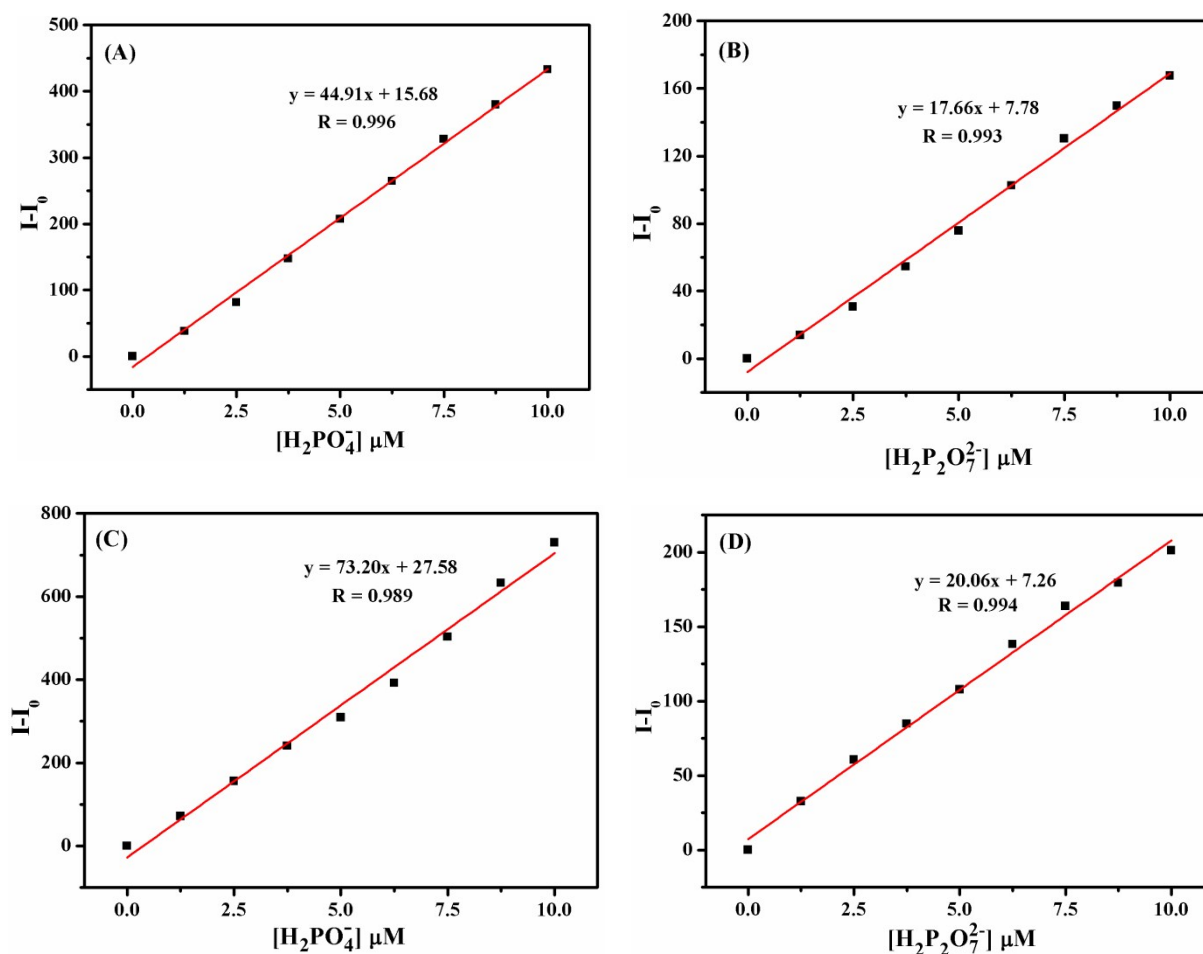

**Fig.S27** A linear plot of RtpH (A, B) and RtpI (C, D) with  $\text{H}_2\text{PO}_4^-$  and  $\text{H}_2\text{P}_2\text{O}_7^{2-}$  in  $\text{CH}_3\text{CN}$ .

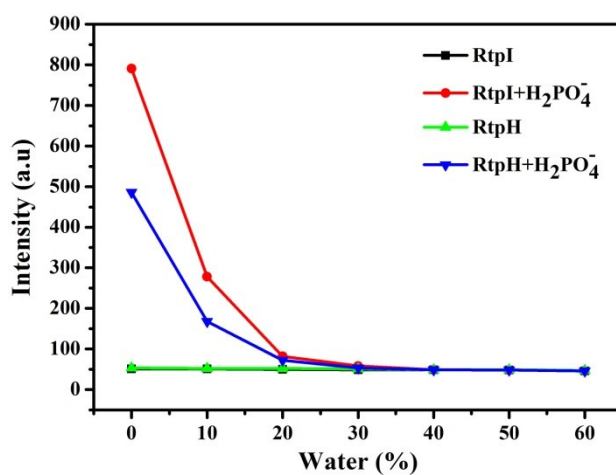

**Fig. S28** The emission intensity of metalloreceptors (RtpH and RtpI, 10  $\mu\text{M}$ ) with phosphate anions ( $\text{H}_2\text{PO}_4^-$  and  $\text{H}_2\text{P}_2\text{O}_7^{2-}$ , 10  $\mu\text{M}$ ) upon varying water percentage with  $\text{CH}_3\text{CN}$ .

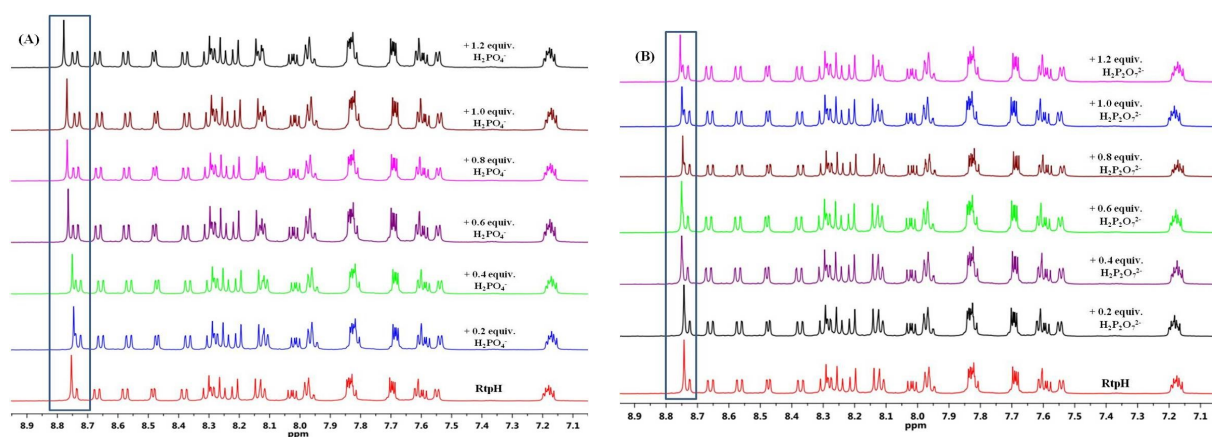

**Fig.S29** (A)  $^1\text{H}$  NMR titration of RtpH (7.5 mM) with  $\text{H}_2\text{PO}_4^-$  (0-1.2 equiv.), (B)  $^1\text{H}$  NMR titration of RtpI (7.5 mM) with  $\text{H}_2\text{PO}_4^-$  (0-1.2 equiv.) in  $\text{CD}_3\text{CN}/\text{D}_2\text{O}$  (9/1, v/v).

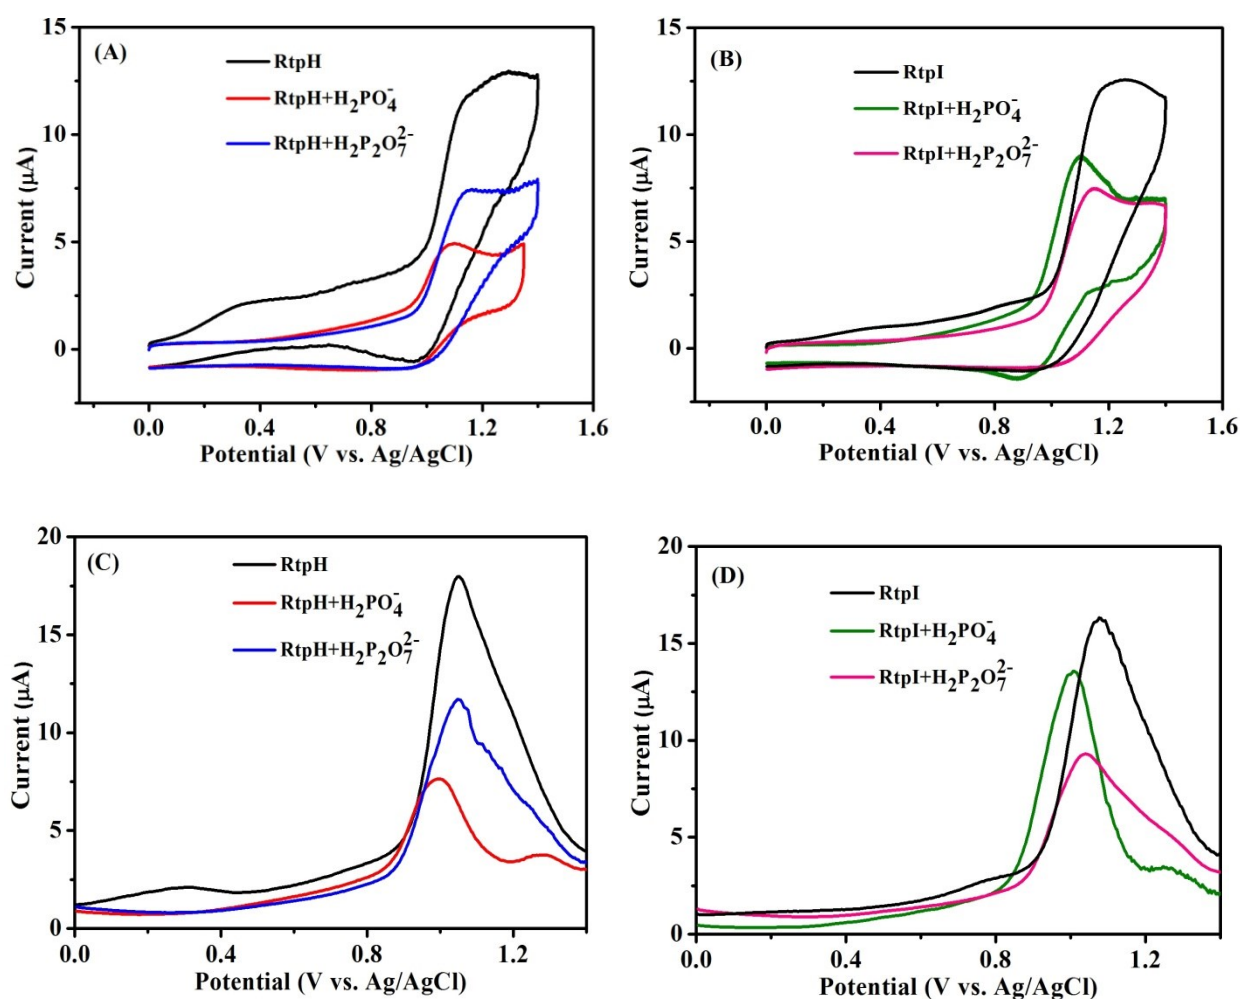

**Fig.S30** (A) Cyclic Voltammetry (A and B) and Differential Pulse Voltammetry (C and D) of metalloreceptors (RtpH and RtpI) with and without phosphate anions.

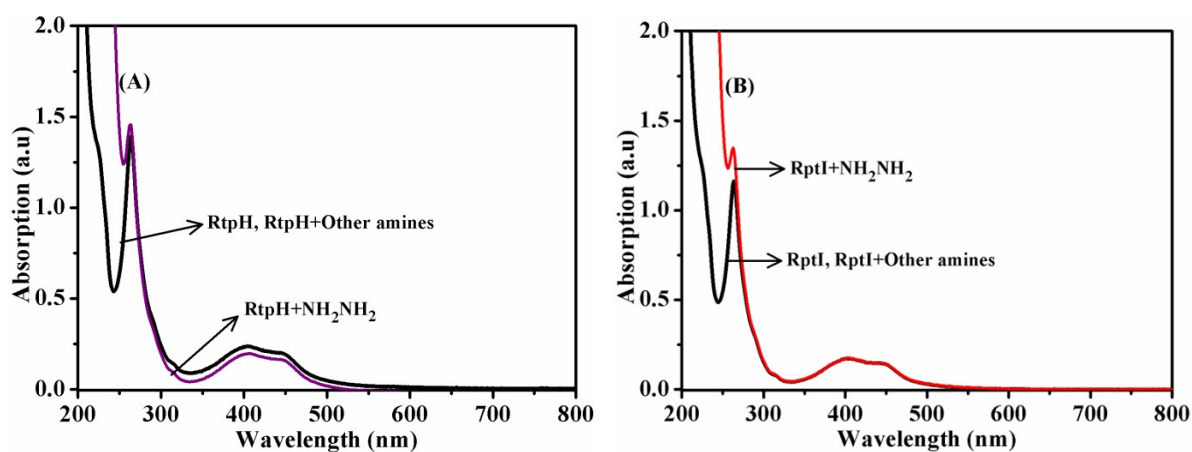

**Fig.S31** (A) UV-Vis spectra of RtpH (25 μM) with various amines (10 equiv.) and hydrazine (4 equiv.), (B) UV-Vis spectra of RtpI (25 μM) with various amines (10 equiv.) and hydrazine (4 equiv.) in CH<sub>3</sub>CN/H<sub>2</sub>O (6/4, v/v).

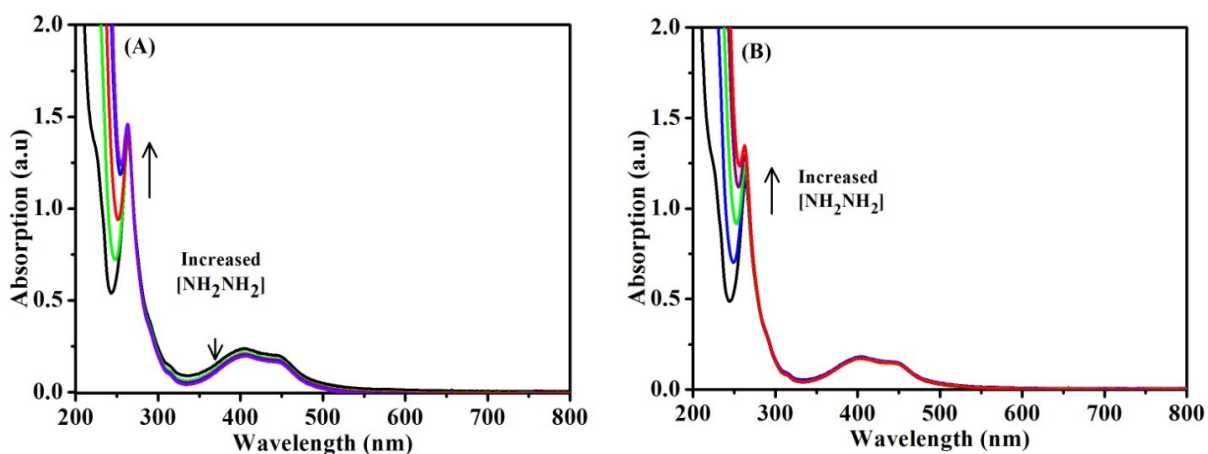

**Fig.S32** (A) UV-Vis spectra of RtpH (25 μM) with the gradual addition of hydrazine (4 equiv.), (B) UV-Vis spectra of RtpI (25 μM) with the gradual addition of hydrazine (4 equiv.) in CH<sub>3</sub>CN/H<sub>2</sub>O (6/4, v/v).

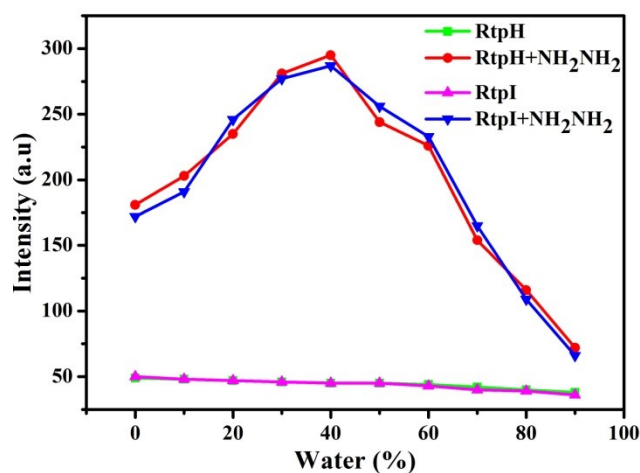

**Fig. S33** The emission intensity of metalloreceptors (RtpH and RtpI, 25 μM) with hydrazine (100 μM) upon varying water percentage with CH<sub>3</sub>CN

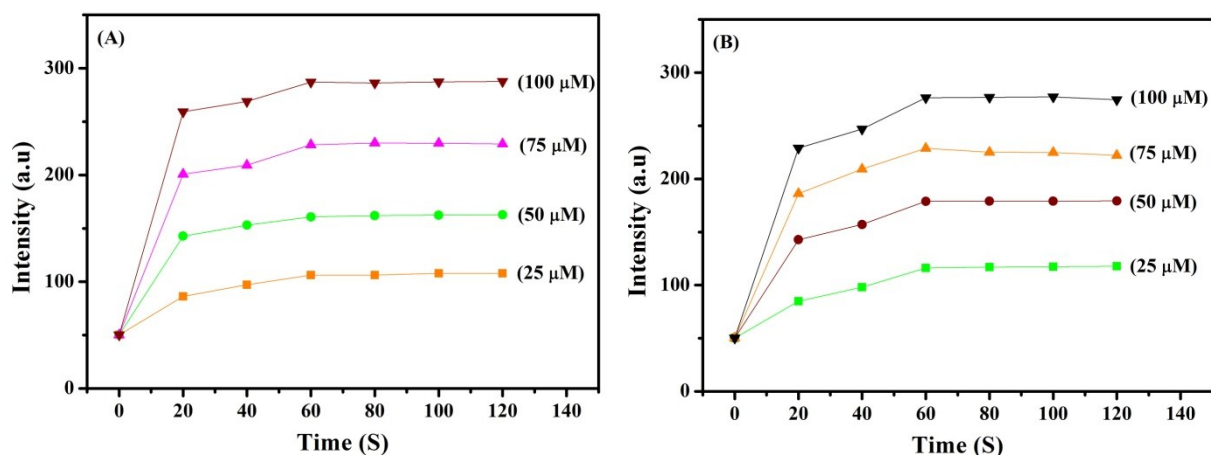

**Fig. S34** (A) Time course study of RtpH (25 μM) upon addition different equivalent of hydrazine (B) Time course study of RtpH (25 μM) upon addition different equivalent of hydrazine

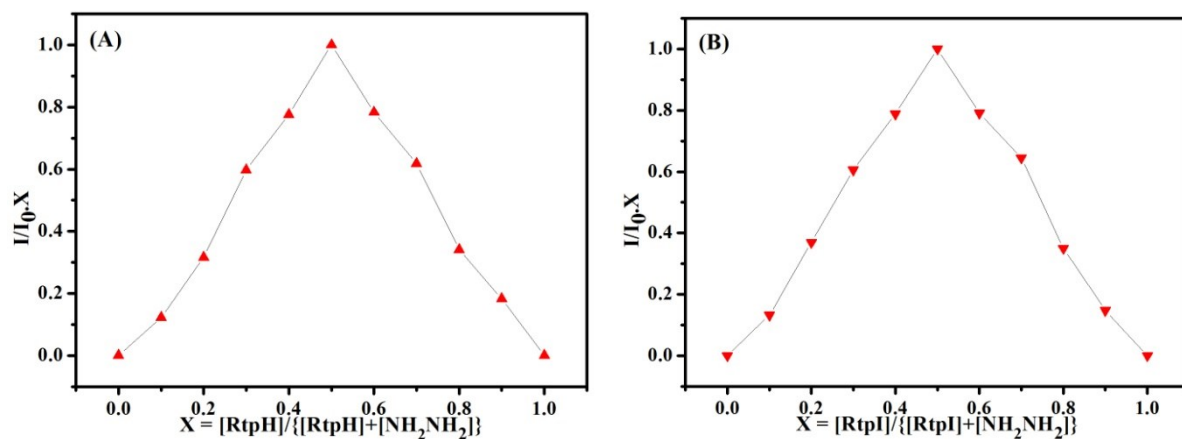

**Fig.S35** (A) Job's plot of RtpH with hydrazine, (B) Job's plot of RtpI with hydrazine in  $CH_3CN/H_2O$  (6/4, v/v)

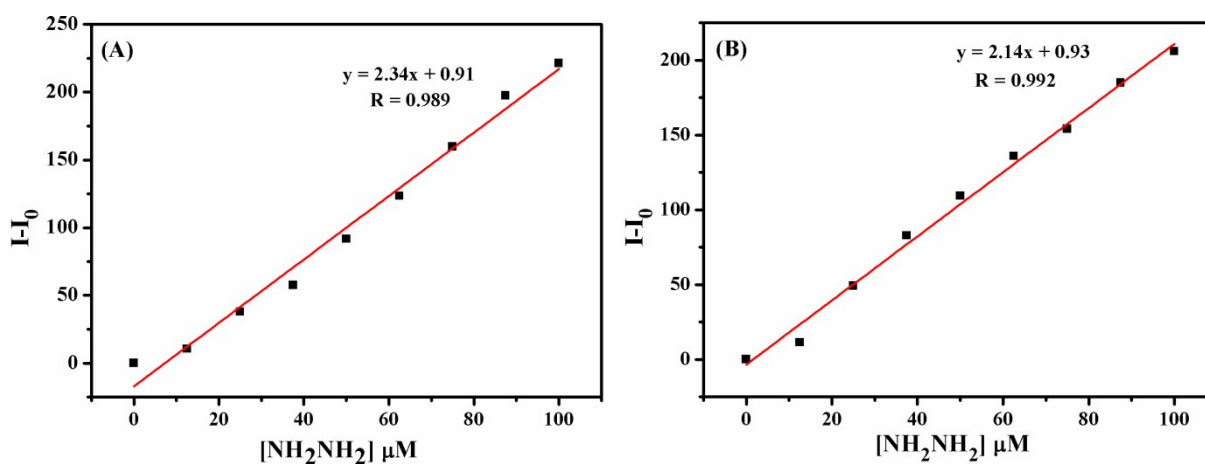

**Fig.S36** (A) A linear plot of RtpH with gradual addition of hydrazine (B) A linear plot of RtpI with gradual addition of hydrazine in  $CH_3CN/H_2O$  (6/4, v/v).



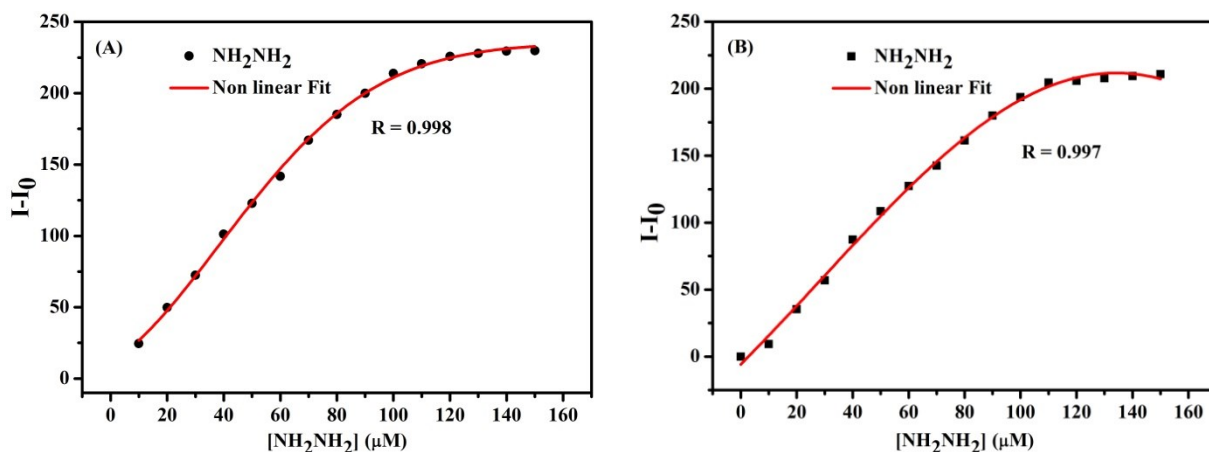

**Fig. S37** (A) Non-linear fitting of RtpH (A)/ RtpI (B) (25  $\mu M$ ) upon addition different concentration of hydrazine

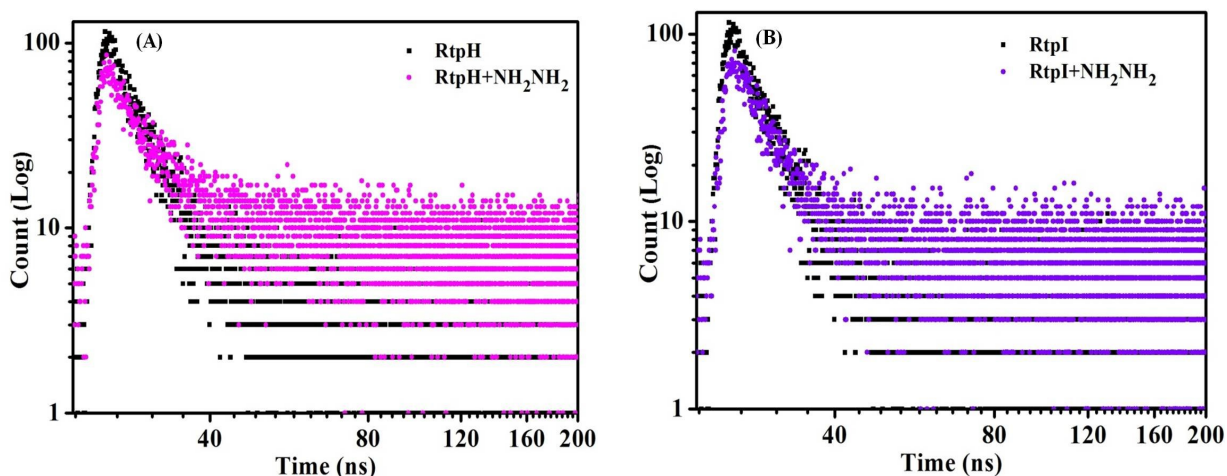

**Fig.S38** (A) Lifetime decay of RtpH (10  $\mu M$ ) with and without hydrazine (4 equiv.), (B) Lifetime decay of RtpI (10  $\mu M$ ) with and without hydrazine (4 equiv.) in  $CH_3CN/H_2O$  (6/4, v/v).

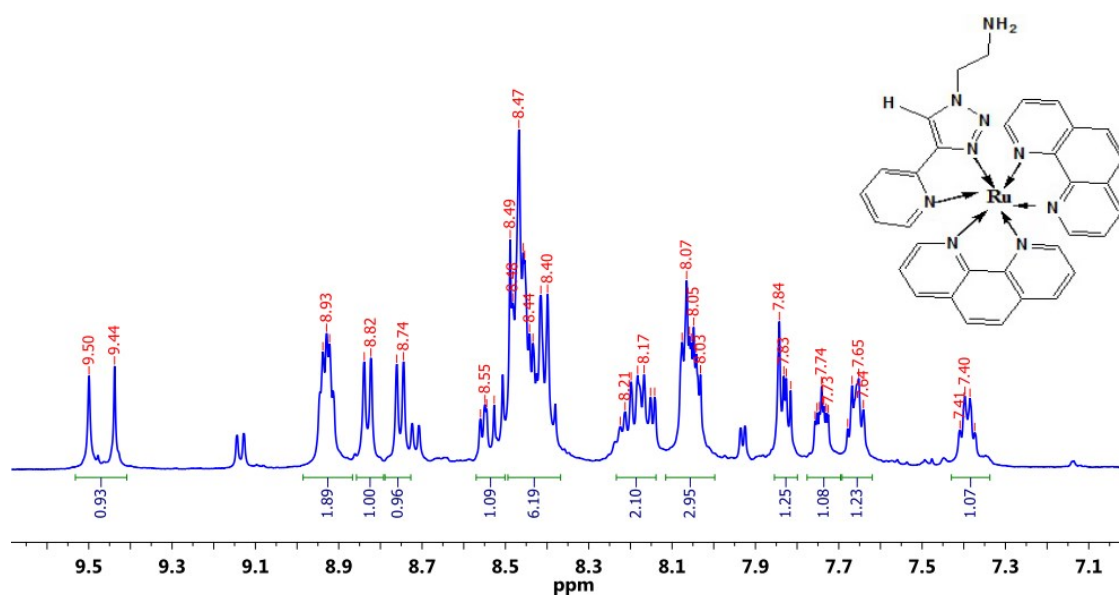

**Fig. S39.** Partial  $^1H$  NMR spectrum of RtpH- $NH_2$  in  $DMSO-d_6$

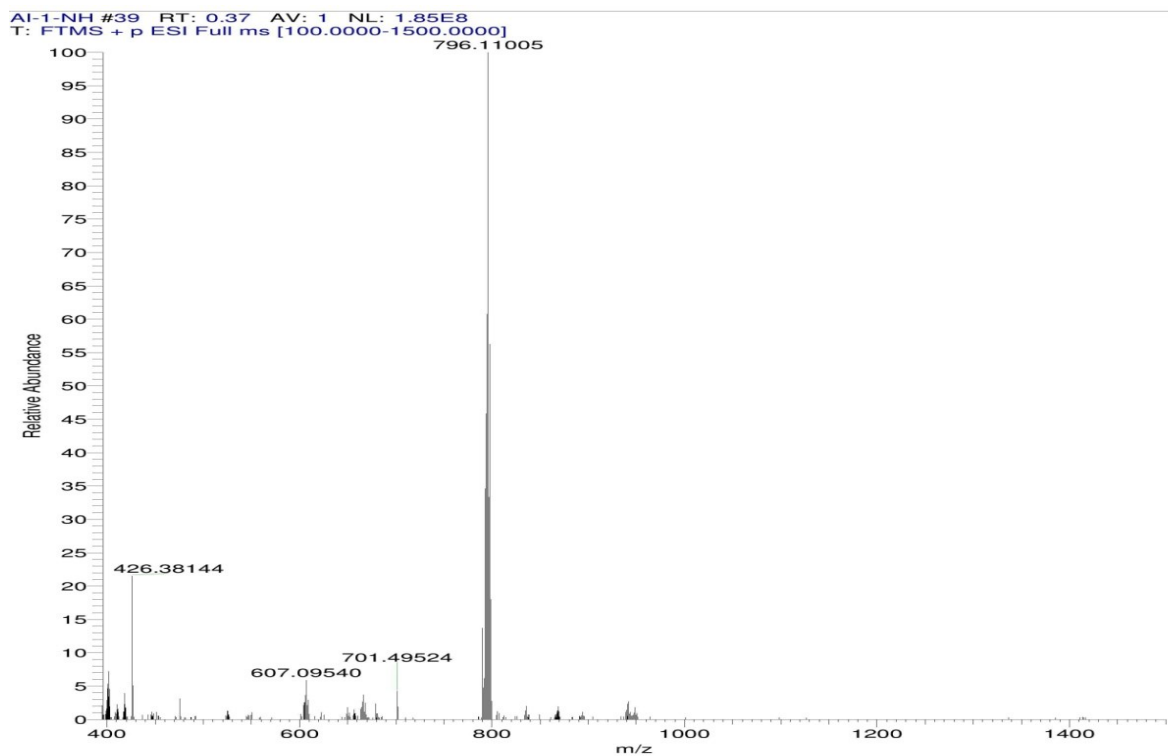

**Fig. S40** HR-ESI Mass spectra of RtpH-NH<sub>2</sub> (Calculated value for [C<sub>33</sub>H<sub>26</sub>F<sub>6</sub>IN<sub>9</sub>PRu]<sup>+</sup> = 796.1080, observed = 796.1100)

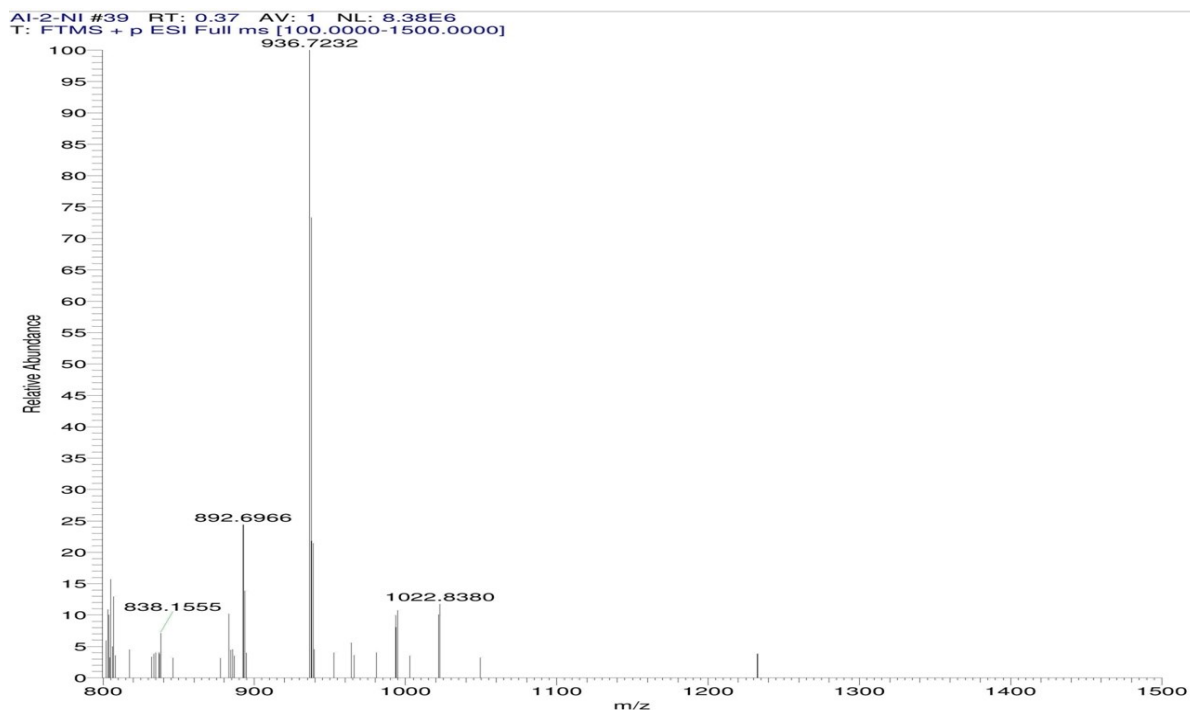

**Fig. S41** HR-ESI Mass spectra of RtpI-NH<sub>2</sub> (Calculated value for [C<sub>33</sub>H<sub>27</sub>F<sub>6</sub>IN<sub>9</sub>PRu]<sup>+</sup> + H + 2Na = 936.7646, observed = 936.7232)



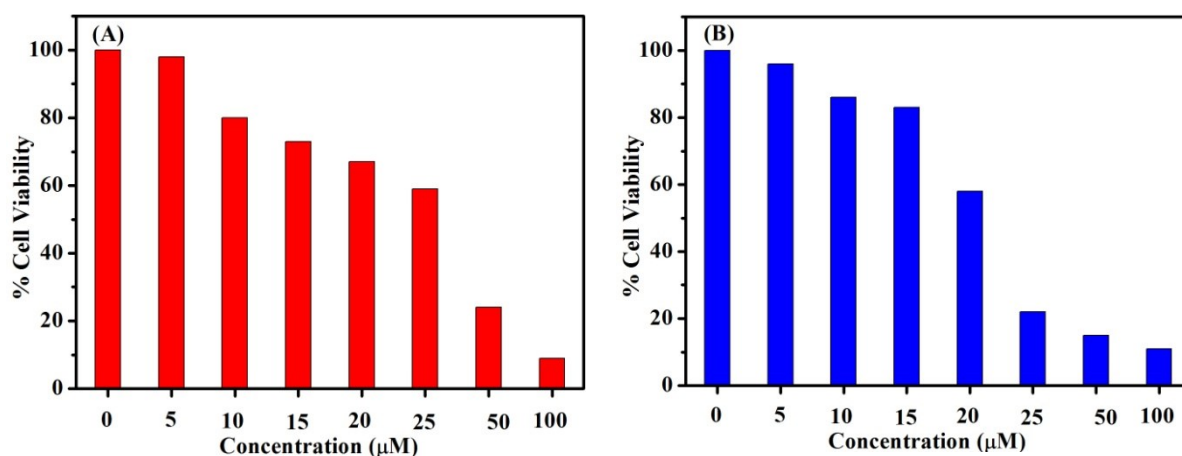

**Fig.S42** Cell viability of HeLa cells in the presence of various concentrations of (A) RtpH and (B) RtpI

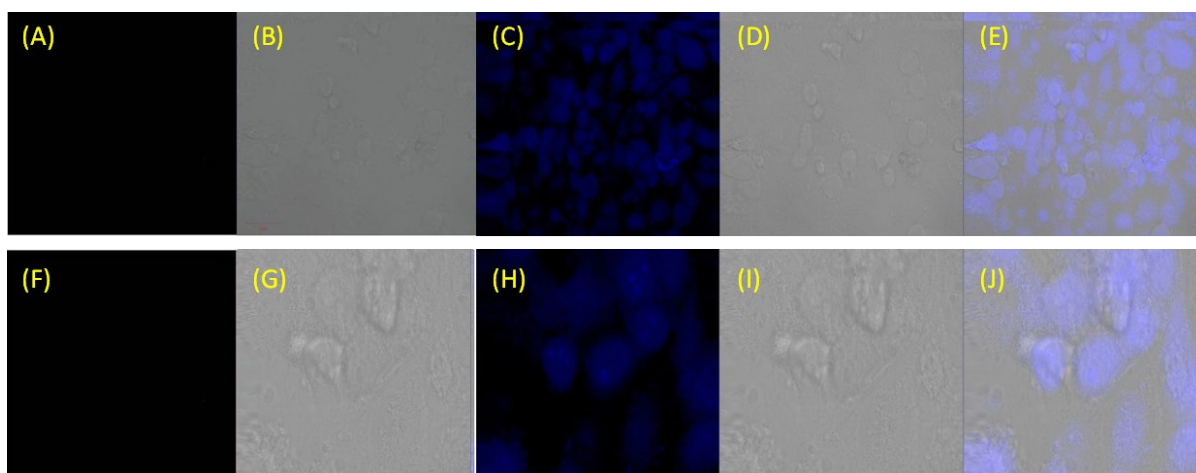

**Fig. S43** Cellular uptake (HeLa) image of  $25\mu\text{M}$  RtpH in dark (A), bright field (B), 4 equiv. of hydrazine treated RtpH (blue filter) (C), 4 equiv. of hydrazine treated RtpH (bright field) (D), 4 equiv. of hydrazine treated RtpH merged with RtpI (E), and  $25\mu\text{M}$  RtpI in dark (F), bright field (G), 4 equiv. of hydrazine treated RtpI (blue filter) (H), 4 equiv. of hydrazine treated RtpI (bright field) (I), 4 equiv. of hydrazine treated RtpI merged with RtpH (J).

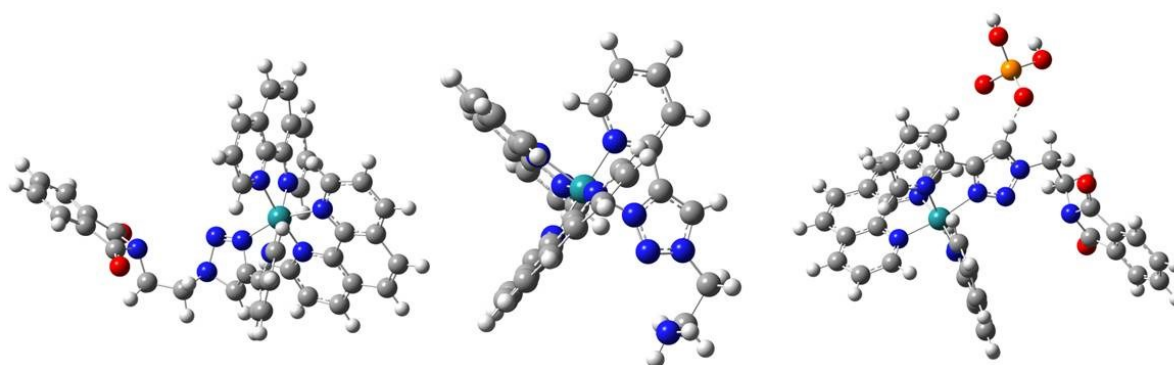

**Fig.S44** Optimized structure of RtpH, RtpH-NH<sub>2</sub>, RtpH-H<sub>2</sub>PO<sub>4</sub><sup>-</sup> (from left to right)

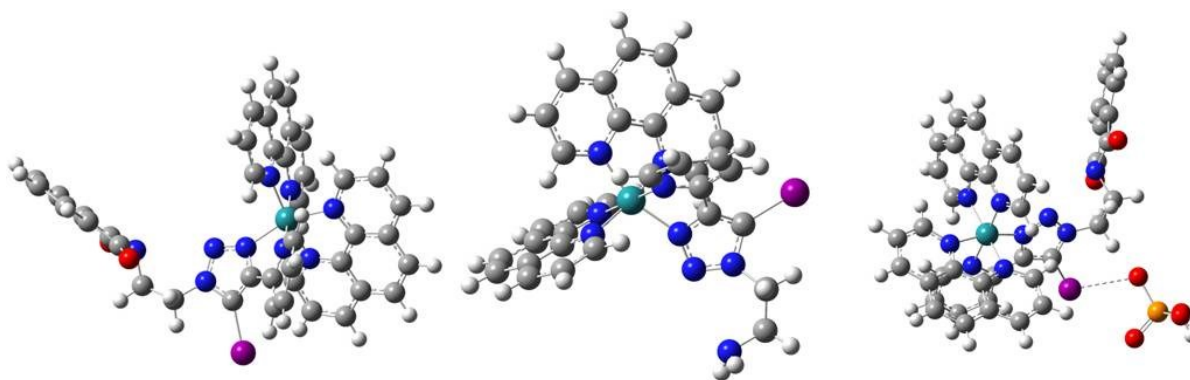

**Fig.S45** Optimized structure of RtpI, RtpI-NH<sub>2</sub>NH<sub>2</sub>, RtpI-H<sub>2</sub>PO<sub>4</sub><sup>-</sup> (from left to right)

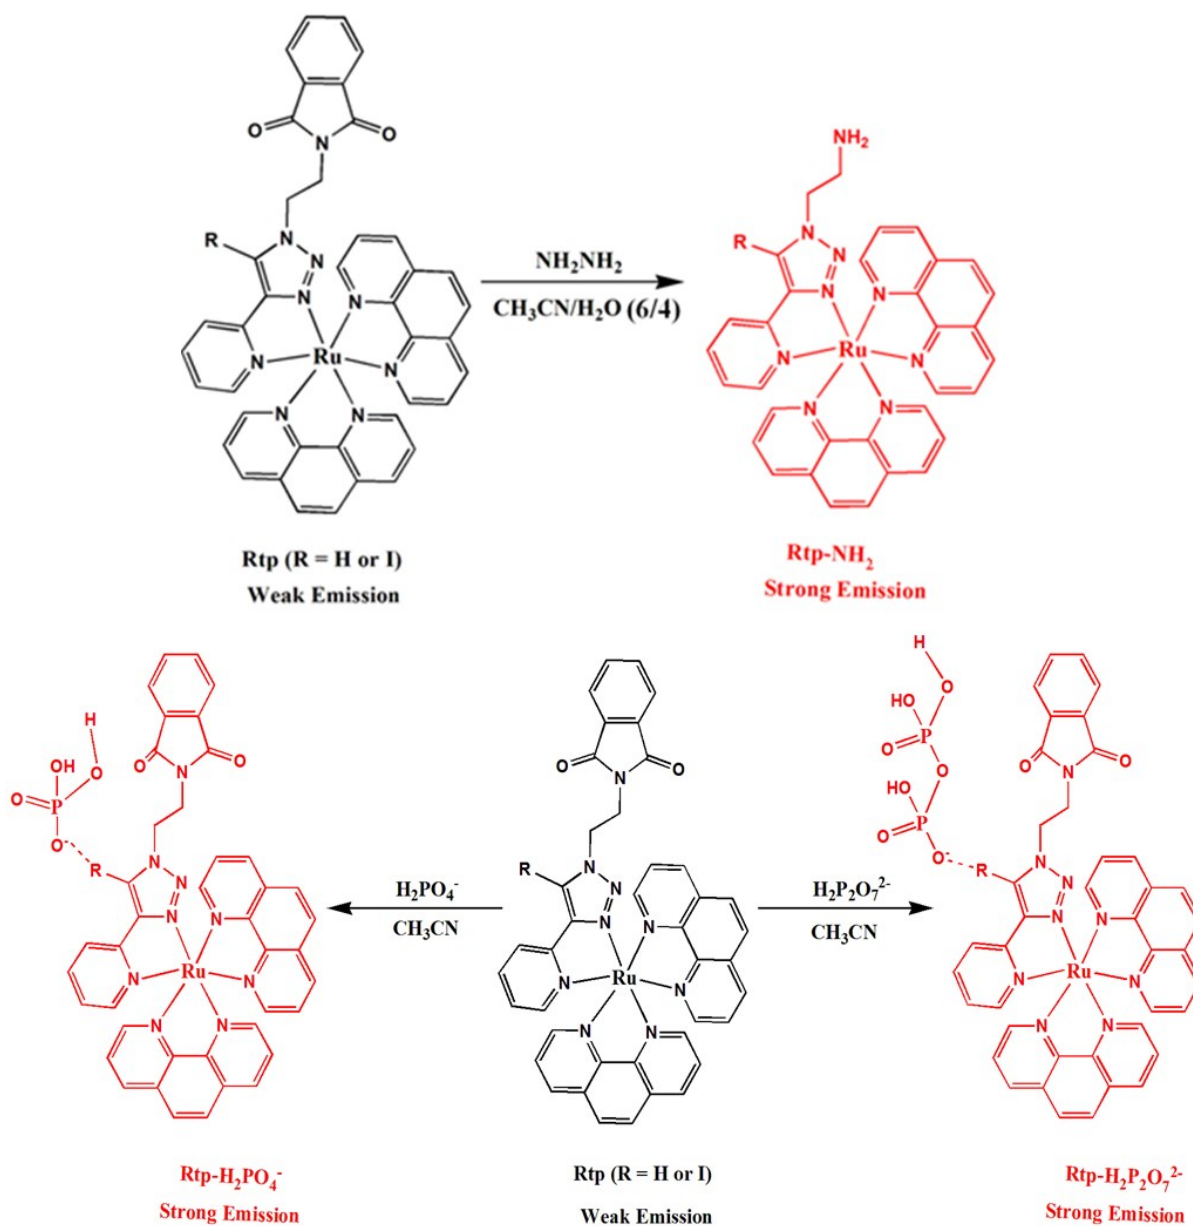

**Fig.S46** Probable reaction mechanism of metalloceptor (RtpH/RtpI) with hydrazine (above) and phosphate anions (proposed anion binding mechanism, below)

| <i>Complex</i>    | <i>IC<sub>50</sub> Value<br/>(against HeLa<br/>cells)</i> |
|-------------------|-----------------------------------------------------------|
| <i>Cis-Platin</i> | <i>7.2 ±1.2 μM</i>                                        |
| <i>RtpH</i>       | <i>28.1 ±3.0 μM</i>                                       |
| <i>RtpI</i>       | <i>22.5 ±1.7 μM</i>                                       |

**Table S1.** IC<sub>50</sub> Values for cis-Platin and metalloreceptors against HeLa cells
